# The genetic architecture of post-zygotic reproductive isolation between *Anopheles coluzzii* and *An. quadriannulatus*

1 Kevin C. Deitz<sup>1\*</sup>, Willem Takken<sup>2</sup>, Michel A. Slotman<sup>1</sup>

2 <sup>1</sup>Department of Entomology, Texas A&M University, College Station, Texas, USA

3 <sup>2</sup>Laboratory of Entomology, Wageningen University and Research, Wageningen, The Netherlands

4

5 \* **Correspondence:**

6 Kevin C. Deitz, Department of Entomology, Texas A&M University, 2475 TAMU, 370 Olsen Blvd,

7 College Station, TX 77843, USA, e-mail: [kcdeitz@gmail.com](mailto:kcdeitz@gmail.com)

8 **Keywords:** *Anopheles gambiae* complex, speciation, hybrid, sterility, inviability, Dobzhansky–

9 Muller incompatibilities, post-zygotic reproductive isolation

10

## 11 **Abstract**

12 The *Anopheles gambiae* complex is comprised of eight morphologically indistinguishable  
13 species and has emerged as a model system for the study of speciation genetics due to the rapid  
14 radiation of its member species over the past two million years. Male hybrids between most *An.*  
15 *gambiae* complex species pairs are sterile, and some genotype combinations in hybrid males cause  
16 inviability. We investigated the genetic basis of hybrid male inviability and sterility between *An.*  
17 *coluzzii* and *An. quadriannulatus* by measuring segregation distortion and performing a QTL analysis  
18 of sterility in a backcross population. Hybrid males were inviable if they inherited the *An. coluzzii* X  
19 chromosome and were homozygous at one or more loci in 18.9 Mb region of chromosome 3. The *An.*  
20 *coluzzii* X chromosome has a disproportionately large effect on hybrid sterility when introgressed into  
21 an *An. quadriannulatus* genetic background. Additionally, an epistatic interaction between the *An.*  
22 *coluzzii* X and a 1.12 Mb, pericentric region of the *An. quadriannulatus* 3L chromosome arm has a  
23 statistically significant contribution to the hybrid sterility phenotype. This same epistatic interaction  
24 occurs when the *An. coluzzii* X is introgressed into the genetic background of *An. arabiensis*, the sister  
25 species of *An. quadriannulatus*, suggesting that this may represent one of the first Dobzhansky–Muller

26 incompatibilities to evolve early in the radiation of the *Anopheles gambiae* species complex. We  
27 describe the additive effects of each sterility QTL, epistatic interactions between them, and genes  
28 within QTL with protein functions related to mating behavior, reproduction, spermatogenesis, and  
29 microtubule morphogenesis, whose divergence may contribute to post-zygotic reproductive isolation  
30 between *An. coluzzii* and *An. quadriannulatus*.

31

## 32 **Introduction**

33 The study of speciation genetics and genomics has largely focused on the evolution of  
34 hybrid dysfunction (Coyne and Orr, 2004; Dobzhansky, 1937) because it represents the first step  
35 in the formation of post-zygotic reproductive isolation between diverging populations. The  
36 evolution of post-zygotic isolation mechanisms is positively correlated with the time of divergence  
37 between two putative species, and is impacted by the number of mutations separating two allopatric  
38 lineages at any given time, the number of incompatibilities per mutation, and the fitness of each  
39 incompatibility (Orr and Turelli, 2001).

40 Post-zygotic isolation occurs as Dobzhansky-Müller incompatibilities (DMI) arise between  
41 populations evolving in allopatry (Dobzhansky, 1936; Müller, 1940). Upon secondary contact of  
42 genetically divergent populations, epistatic loci on parental chromosomes are unable to function  
43 effectively in hybrids. The resulting gene products in hybrids can have unpredictable, deleterious  
44 epistatic interactions (Maheshwari and Barbash, 2011). Orr (1995) and Orr and Turelli (2001)  
45 proposed the “snowball effect” of DMI evolution, which predicts that the number of DMIs  
46 accumulating between lineages “snowballs”, or increases faster than linearly (see Kalirad and  
47 Azevedo, 2017 for explicit testing of the underlying assumptions of this model). The snowball  
48 effect has been supported by empirical evidence of the rate of DMI evolution between *Drosophila*  
49 (Matute et al., 2010; Matute and Gavin-Smyth, 2014) and *Solanum* sibling species pairs (Moyle  
50 and Nakazato, 2010).

51 DMI can evolve as a result of various mechanisms in either an ecological speciation  
52 (divergent evolution due to selection pressures imposed by novel environments) or mutation-order  
53 speciation scenarios (fixation of different, incompatible mutations in allopatric populations  
54 experiencing the same environmental conditions) (Mani and Clarke, 1990; Nosil and Flaxman,  
55 2011). These mechanisms include mutation-driven co-evolution (e.g. copper tolerance in *Mimulus*  
56 *guttatus*, MacNair, 1983; MacNair and Christie, 1983), gene duplication (e.g. the *OdsH* gene in  
57 *Drosophila simulans* × *D. mauritiana* backcross males, Ting et al., 2004; Sun et al., 2004), gene  
58 transposition (e.g. the *JYAlpha* gene in *D. melanogaster* × *D. simulans* backcross males, Masley et  
59 al., 2006), or a molecular arms race (e.g. divergent NB-LRR alleles in *Arabidopsis thaliana* strains,  
60 Bomblies et al., 2007; Bomblies and Weigal, 2007; Bakker et al., 2006). Furthermore, divergence  
61 in gene regulatory regions between parental species can result in allelic imbalance in hybrids  
62 due to incompatible *cis*- and/or *trans*-acting factors (Graze et al., 2012), and segregation distortion  
63 of parental loci can skew sex ratios of hybrid progeny (Orr and Irving, 2005; Phadnis and Orr,  
64 2009).

65 The *Anopheles (An.) gambiae* complex is comprised of eight morphologically  
66 indistinguishable species and has emerged as a model system for the study of speciation genetics  
67 due to the rapid radiation of its member species over the past two million years (Fontaine et al.,  
68 2015). All members of the *An. gambiae* complex are competent vectors of human malaria parasites,  
69 though they differ in their host specificity, ranging from highly anthropophilic (*An. gambiae s.s.*  
70 and *An. coluzzii*) (Takken and Knols, 1990; Dekker and Takken, 1998; Pates et al., 2001a) to almost  
71 entirely zoophilic (*An. quadriannulatus* A) (White, 1974; Gibson, 1996; Dekker and Takken, 1998;  
72 but see Pates et al., 2001b). From a vector control stand point, recent advances in the development  
73 of transgenic mosquito control methods have made understanding the permeability of species  
74 boundaries even more urgent (e.g. Kyrou et al., 2018) because it is important to know whether  
75 transgenic alleles have the potential to introgress between target and non-target species.

76 F1 hybrid female progeny of crosses between species of the *Anopheles gambiae* complex  
77 are fertile, but, with the exception of the *An. gambiae* - *An. coluzzii* species pair, males range from  
78 semi- to completely sterile (White, 1974; Hunt, 1998). A previous QTL analyses of sterility in bi-  
79 directional backcross hybrids identified regions in the *An. coluzzii* genome that cause male and  
80 female sterility when introgressed into an *An. arabiensis* genetic background, and vice versa  
81 (Slotman et al., 2004; Slotman et al., 2005). One or more loci on the X chromosome contribute to  
82 the effect of the X chromosome on the hybrid sterility phenotype in both directions of the cross.  
83 Unfortunately, recombination on the X chromosomes is suppressed in hybrids by the *Xag* inversion,  
84 which is fixed within *An. coluzzii* but absent in *An. arabiensis*. The *Xag* inversion comprises ~75%  
85 of the *An. coluzzii* X chromosome. This limits our ability to map genes to the X chromosome  
86 between species in the complex that harbor the *Xag* inversion (*An. gambiae*, *An. coluzzii*, and *An.*  
87 *merus*), and those that have the standard arrangement, including *An. quadriannulatus*.

88 Slotman et al. (2004) also identified both partially dominant and partially recessive male  
89 sterility QTL on the 2<sup>nd</sup> and 3<sup>rd</sup> chromosomes in both backcrosses. Consistent with the Dobzhansky-  
90 Muller model (Dobzhansky, 1936; Muller, 1940), and previous results from *Drosophila* (Wu and  
91 Beckenback, 1983; Orr and Coyne, 1989) the position of autosomal sterility QTL differs between  
92 each backcross. Complete sterility is achieved through the inheritance of at least three to four  
93 autosomal sterility loci (Slotman et al., 2004), including a pericentromeric QTL on the 3L  
94 chromosome arm. Hybrid male inviability is caused by an incompatibility between the *An. coluzzii*  
95 X chromosome and at least one locus on each autosome of *An. arabiensis*.

96 Female hybrid sterility QTL are present on the third chromosomes of both *An. coluzzii* and  
97 *An. arabiensis* (Slotman et al., 2005). A QTL on the second chromosome *An. coluzzii* causes female  
98 hybrid sterility when it is introgressed into an *An. arabiensis* genomic background. However, the  
99 female sterility phenotype is affected primarily by the interaction of a foreign X chromosome with  
100 the two autosomal QTL. Approximately 75% of observed phenotypic variance is due to the X

101 chromosome, which only represents 8.8% of the genome (Holt et al., 2002). Due to the lack of  
102 recombination between X chromosomes in the cross, the number of loci on the X chromosome that  
103 effect the hybrid sterility phenotype is unknown. Therefore, the impact of the X on the hybrid  
104 sterility phenotype could result from one locus of major effect, or the effects could be spread across  
105 multiple loci. A comparison of the data between the male (Slotman et al., 2004) and female  
106 (Slotman et al., 2005) *An. coluzzii* × *An. arabiensis* hybrid sterility data shows that there are a  
107 greater number of male than female hybrid sterility QTL, supporting previous studies that found  
108 male sterility factors to evolve faster than female sterility factors (Charlesworth et al., 1987;  
109 Kirkpatrick and Hall, 2004). This is consistent with faster male evolution observed in *Aedes*  
110 mosquitoes (Presgraves and Orr, 1998), and the higher numbers of male versus female sterility  
111 factors in *Drosophila* (e.g. Hollocher et al., 1996; True et al., 1996; Tao and Hartl, 2003).

112 In order to better understand how post-zygotic reproductive isolation evolved during the  
113 rapid radiation of the of the *An. gambiae* species complex we performed a QTL analysis of male  
114 hybrid sterility in a (*An. coluzzii* × *An. quadriannulatus*) F1 × *An. quadriannulatus* backcross, and  
115 identified regions of the *An. coluzzii* genome that contribute to hybrid male sterility and inviability  
116 when introgressed into an *An. quadriannulatus* genetic background. We discuss how these QTL  
117 relate to those identified in the (*An. coluzzii* × *An. arabiensis*) F1 x *An. arabiensis* backcross  
118 (Slotman et al., 2004), and the implications these findings have on our understanding of the  
119 evolution of post-zygotic reproductive isolation in the *Anopheles gambiae* species complex, and  
120 more broadly, in the context of rapid species radiations.

121

## 122 **Methods**

### 123 *Backcross and Phenotype Scoring*

124 We performed a backcross between the SUA2La strain of *An. coluzzii* and the SANGUA  
125 strain of *An. quadriannulatus* to identify regions of the *An. coluzzii* genome that exhibit DMI with

126 the *An. quadriannulatus* genome, resulting in F1 male sterility. The *An. coluzzii* strain was  
127 established from collections in Suakoko, Libera and the *An. quadriannulatus* strain was established  
128 in from populations in Sangwe, Zimbabwe. Both strains have been lab reared for hundreds of  
129 generations. We used a standard backcross scheme that has been used in studies to investigate the  
130 genetic basis of hybrid sterility and inviability going back to Dobzhansky (1936). F1 *An. coluzzii*  
131  $\times$  *An. quadriannulatus* (females  $\times$  males, respectively) hybrids were reared and backcrossed to *An.*  
132 *quadriannulatus* males *en masse*. Consistent with crosses between *An. coluzzii* and *An. arabiensis*,  
133 the Xag inversion was expected to suppress recombination between the X chromosomes of *An.*  
134 *coluzzii* and *An. quadriannulatus*.

135 The *2La* inversion is also fixed between the mosquito strains used in this cross, limiting our  
136 mapping resolution in this region of the genome. While the *2La* is polymorphic within *An. coluzzii*,  
137 and *An. coluzzii* strains with the standard arrangement (co-linear with *An. quadriannulatus*) are  
138 available, we used the same *An. coluzzii* strain as Slotman et al. (2004) to allow a comparison  
139 between them.

140 The testes of male hybrids were dissected and squashed between a microscope slide and a  
141 cover slip. Each hybrid male mosquito was assigned a sterility phenotype following Slotman et al.  
142 (2004). Sterility scores were primarily based upon the proportion of normal to abnormal sperm. If  
143 no sperm was present, testes were often atrophied as well. In some instances, testes were missing  
144 completely. Phenotype scores were as follows: (1) normal testes and sperm, (2) slightly abnormal  
145 sperm, (3) 50/50 normal and abnormal sperm, (4) mostly abnormal sperm, (5) entirely abnormal  
146 sperm, (6) no sperm present and/or severely atrophied testes, (7) no testes present. Phenotyping  
147 was conducted by a single observer, without repeat observations. If unambiguous scoring was not  
148 possible, or if the reproductive tissues were damaged during dissection, the sample was discarded.  
149 Mosquitoes were preserved in 100% ethanol after phenotyping for DNA extraction and genotyping.

150 *DNA sequencing*

151 DNA extractions were performed on a Qiagen Biosprint DNA extraction machine (Qiagen  
152 Inc, Valencia, CA). Extracted DNA was suspended in 200µl Qiagen elution buffer and stored at -  
153 20°C. Each mosquito was genotyped using the restriction enzyme-based, genotype-by-sequencing  
154 approach according to the multiplexed shotgun genotyping (MSG) approach published by  
155 Andolfatto et al. (2011).

156 Briefly, 10 ng of genomic DNA of each mosquito was digested with the restriction enzyme  
157 MseI, which cuts the *An. gambiae* genome on average every 183.2 bp. Samples were digested for  
158 three hours at 37°C, followed by a 20 minute, 65°C enzyme deactivation step. Non-ligated bar-  
159 coded adapters were removed using an isopropanol precipitation, and bar-coded samples with  
160 unique adapters were pooled (96 per plate). Pooled samples were precipitated via centrifugation  
161 and re-suspended in TE buffer. Next, DNA was bead-purified using an Agencourt AMPure PCR  
162 purification kit. Bar-coded, purified DNA was size selected to a range of 250-400 bp using a Pippen  
163 Prep and then amplified using a Phusion High-Fidelity PCR kit. Samples were amplified using a  
164 common primer, and an indexed, library-specific primer (one per plate) that also incorporates the  
165 Illumina flow-cell adapter. Thus, individuals were identifiable to a library prep by their index and  
166 to the individual level by their barcoded adapter. Library amplification (PCR) was performed at a  
167 range of 12-18 cycles to identify the minimum number necessary to amplify the library to a target  
168 of 10-30 ng/uL (post clean up) in an effort to mitigate the incorporation of PCR errors. Amplified  
169 libraries were bead-purified using an Agencourt AMPure PCR purification kit. Library size  
170 distribution, integrity, and DNA concentration was confirmed by running each library on a  
171 NanoDrop and BioAnalyzer prior to sequencing. We phenotyped and sequenced a total of 841 male  
172 backcross hybrids. Hybrids were sequenced at the Texas A&M Genomics and Bioinformatics core  
173 facility on an Illumina HiSeq 2500 using 125 bp, single-end chemistry to 0.5-2.0x depth per  
174 individual.

175 We also performed pool-seq of ten *An. coluzzii* females and ten *An. quadriannulatus*  
176 females in order to identify fixed genetic difference between parental strains that would be  
177 diagnostic of the origin of genomic regions introgressed from *An. coluzzii* into *An. quadriannulatus*  
178 in the backcross. Libraries were sequenced on a single lane of Illumina HiSeq 2500 using 150 bp,  
179 paired-end chemistry to an average depth of 110.5x (*An. coluzzii*) and 66.9x (*An. quadriannulatus*).  
180 Additionally, we prepared and sequenced MSG libraries for 192 *An. coluzzii* and 192 *An.*  
181 *quadriannulatus* females to further validate ancestry informative markers and tune the MSG  
182 software error model.

### 183 *Parental pseudo-reference Construction*

184 *An. coluzzii* pool-seq reads were aligned to the *An. gambiae* AgamP4.4 reference genome  
185 using the BWA mem alignment algorithm (Li and Durban, 2010) and SNPs were called using  
186 bcftools mpileup (v1.3) (Li et al., 2009). SNPs within three bases of indels were excluded. A  
187 pseudo-reference for *An. coluzzii* was created by updating the AgamP4.4 reference genome  
188 (vectorbase.org) with SNPs that had read depth between greater than 10 and less than 1000, map  
189 quality greater than 20, and a phred-scaled quality score for the alternative allele greater than 26.  
190 The *An. quadriannulatus* pseudo-reference was created in a similar fashion, but by aligning it to  
191 the *An. coluzzii* pseudo-reference and updating this with fixed SNPs (*An. coluzzii* – *An.*  
192 *quadriannulatus* divergent) that met the thresholds above.

### 193 *Hybrid Genotyping*

194 We used Trimmomatic version 0.30 (Bolger et al., 2014) to trim MSG sequencing reads by  
195 quality by simultaneously soft clipping the reads from both 5' and 3' ends to an average phred  
196 quality score of 20, with no single bp in a four bp window below a phred quality score of 20. Only  
197 reads  $\geq 50$  bp were retained for alignment and subsequent analyses.

198 We used the MSG software package (Andolfatto et al., 2011) to align hybrid MSG data to  
199 parental pseudo-references and estimate the posterior probabilities of ancestry at genome-wide



200 SNPs that were informative of parental ancestry. We removed 33 hybrids from this analysis due to  
201 low sequencing coverage (<10K reads). Posterior probabilities of ancestry were thinned using  
202 `pull_thin_tsv.py` ([https://github.com/dstern/pull\\_thin](https://github.com/dstern/pull_thin)). We considered a marker to be informative  
203 if its conditional probability of being homozygous differed by more than 0.10 from its neighboring  
204 marker. Missing genotypes were imputed using the hidden Markov model implemented in the  
205 `sim.geno()` function of R/qtl (Broman et al., 2003)

### 206 *Sterility QTL Mapping*

207 We used R/qtl (Broman et al., 2003) to identify redundant, adjacent markers and further  
208 thinned our marker set to include only informative markers. It is important to note that this  
209 experiment is not marker, but recombination limited. Therefore, many markers are redundant, and  
210 we removed these to reduce computational time. Next, we used R/qtl to estimate the genetic map  
211 of 808 hybrid males using the Kosambi map function (Kosambi, 1943). We performed quantitative  
212 trait locus mapping with the composite interval mapping (CIM) method using 15 markers as co-  
213 factors, and also assessed the significance of QTL models using multiple imputation mapping. This  
214 method drops one QTL at a time to calculate the probability of QTL locations and their interactions  
215 using an ANOVA (Sen and Churchill, 2001). In all analyses, sterility was treated as a normal trait,  
216 and we used 1000 permutation replicates to assess the significance of log of odds (LOD) scores.

217 Ultimately, we took three approaches to identify sterility QTL in the dataset. The first was to  
218 scan for QTL using the composite interval mapping and calculating the logarithm of these odds (LOD)  
219 score every 1 cM. When calculating LOD scores we controlled for the genetic background of adjacent  
220 markers by using 15 marker covariates across the genome. Due to the skew of the phenotype scores  
221 toward “normal”, and severe segregation distortion of the X chromosome, we hypothesized that the  
222 QTL identified through CIM of the full dataset were in fact comprised of two types: (1) autosomal *An.*  
223 *coluzzii* loci that are incompatible with the *An. quadriannulatus* X, and (2) homozygous *An.*  
224 *quadriannulatus* autosomal loci that interact epistatically with the *An. coluzzii* X in individuals that are

225 otherwise primarily heterozygous at autosomal loci (recovering viability despite the inheritance of a  
226 non-recombinant *An. coluzzii* X chromosome). Thus, we also split the dataset into individuals that had  
227 inherited the *An. quadriannulatus* X (N = 568) and *An. coluzzii* X (N = 211), respectively, and  
228 performed CIM (as above) on these datasets separately.

229         Next, we tested all peaks identified by CIM, regardless of significance or LOD score, in the full  
230 dataset, and any peaks that were unique to either the *An. quadriannulatus* X or *An. coluzzii* X datasets,  
231 respectively, by adding each peak independently to the multiple imputation QTL model that also  
232 contained the highly significant X chromosome QTL. After identifying all peaks that had a significant  
233 additive effect in the multiple imputation QTL model, we tested epistatic interactions between each, in  
234 a pairwise fashion, by adding each of these interactions to the model independently. This approach  
235 allowed us to identify peaks (and their interactions) which, despite having non-significant LOD scores  
236 in the CIM permutation test, were found to have a significant impact on sterility when incorporated  
237 into the multiple imputation QTL model.

238         We identified candidate sterility genes within QTL by determining the 1.5 LOD interval of all  
239 QTL peaks in base pairs, and used these coordinates to download the list of annotated genes within  
240 QTL from the AgamP4 genome using the VectorBase ([vectorbase.org](http://vectorbase.org)) genome browser using the  
241 “Export Data” function. Next we used the PANTHER classification system (Mi et al., 2019) gene list  
242 analysis search function ([pantherdb.org](http://pantherdb.org)) to search for the protein annotations and functions of these  
243 genes. Finally, we performed a protein network analysis on the entire gene list using STRING  
244 (Szklarczyk et al., 2019) in order to identify direct interactions between putative sterility genes.

#### 245 *Identification of Inviability Loci*

246         We identified regions of the *An. coluzzii* genome that result in hybrid inviability when  
247 introgressed into an *An. quadriannulatus* genetic background by analyzing segregation distortion  
248 of autosomal loci in the *An. quadriannulatus* X chromosome and *An. coluzzii* X chromosome  
249 datasets. We used the mean, genome-wide proportion of *An. quadriannulatus* homozygosity in the

250 full *An. coluzzii* × *An. quadriannulatus* backcross population as the expected homozygosity  
251 proportion, assuming Hardy-Weinberg equilibrium. We used a chi-square test to identify loci that  
252 deviate significantly (p-value < 6.01e-05 after Bonferroni correction) from expected homozygosity.

## 253 **Results**

### 254 *Pseudo-reference Construction, Genotyping, and Genetic Map*

255 After whole genome alignment, SNP calling, and variant filtering of the *An. coluzzii* pool-seq  
256 data, we generated the *An. coluzzii* pseudo-reference by incorporating 4,391,200 filtered SNPs into the  
257 *An. gambiae s.s.* AgamP4 reference genome. To construct the *An. quadriannulatus* pseudo-reference,  
258 we updated the *An. coluzzii* pseudo-reference with 4,242,426 *An. quadriannulatus* SNPs that were  
259 found to be fixed between the *An. quadriannulatus* and *An. coluzzii* pool-seq samples. MSG data is  
260 inherently low coverage, so not all fixed differences between the pool-seq datasets were subsequently  
261 used for hybrid genotyping.

262 We calculated genotype probabilities at 239,420 ancestry informative SNPs for 808 *An. coluzzii*  
263 × *An. quadriannulatus* backcross hybrid males. Ultimately, we trimmed the dataset to 860 non-  
264 redundant markers (Table 1). The mean proportion of missing data per individual was 0.021 (sd =  
265 0.060, range = 0.0 – 0.445). These markers were used to calculate a genetic map (Figure 1) with  
266 Kosambi distances of 206.1 cM for the second chromosome (110.9 Mb), 100.7 cM for the third (95.2  
267 Mb), and 3.7 cM for the X (24.4 Mb) (Table 1, Figure 1). The larger relative genetic map of the second  
268 chromosome is likely due to the presence of the *2La* inversion, which is fixed between these species  
269 and can significantly increase recombination frequency on the 2R (i.e. Schultz-Redfield Effect, Schultz  
270 and Redfield, 1951; Lucchesi and Suzuki, 1968; Stevison et al., 2011), and segregation distortion  
271 resulting from male inviability for some genotype combinations (Zuo et al., 2019; Hackett and  
272 Broadfoot, 2003).

273 The genetic length of the X chromosome was expected to be low due to the presence of the *Xag*  
274 inversion, which comprises 80% of the X and is fixed for alternate arrangements between these species.

275 The majority of hybrids (70.3%, N = 568) inherited a non-recombinant *An. quadriannulatus* X  
276 chromosome, 26.1% (N = 211) inherited a non-recombinant *An. coluzzii* X, and 3.5% (N = 29) a  
277 recombinant X. The mean sterility score (ranging from 1-7, normal to completely sterile) was 2.62 (sd  
278 = 2.34). The majority of backcross mosquitoes (64.23%, N = 519 ) were fully fertile (sterility score =  
279 1).

### 280 *Segregation distortion and inviability*

281 Segregation distortion was previously documented in male and female hybrids between  
282 member species of this complex (Slotman et al., 2004; Slotman et al., 2005; Smith et al., 2015).  
283 Furthermore, the complete absence of specific genotypes can indicate their inviability. We tested for  
284 significant segregation distortion of autosomal loci in the *An. coluzzii* X and *An. quadriannulatus* X  
285 datasets, respectively, by comparing the proportion of *An. quadriannulatus* homozygosity at each locus  
286 to the genome-wide average in the full dataset. It is important to note that this analysis was performed  
287 on a per locus basis, and is agnostic of interactions between loci.

288 In the *An. quadriannulatus* X dataset, 67.3% (N=296) of chromosome 2 loci and 18.4% (N=72)  
289 of chromosome 3 loci showed significant segregation distortion (Figure 2). Loci on the chromosome 2  
290 exhibit both homozygote excess and deficit (heterosis), while only homozygote excess is exhibited on  
291 chromosome 3. In the *An. coluzzii* X dataset, 23.9% (N=105) of chromosome 2 loci and 69.6% (N=273)  
292 of chromosome 3 loci showed significant segregation distortion. Interestingly, 40.8% of chromosome  
293 3 loci (spanning a 18.9 Mb region) lack homozygotes in all genotyped individuals, indicating  
294 individuals that inherited the *An. coluzzii* X and were *An. quadriannulatus* homozygous at loci inside  
295 this region were completely inviable (Figure 2). No autosomal heterozygote excess was observed in  
296 the *An. coluzzii* X dataset.

### 297 *Composite Interval Mapping*

298 Due to minimal recombination events, the X chromosome is effectively one large QTL with a  
299 LOD score of 203.4 (Table 2). By comparison, none of the autosomal QTL reach a LOD score of 4.0.

300 No autosomal QTL fall above the CIM 5% significance threshold (LOD=4.31, 1,000 permutations).  
301 Despite this, we annotated three QTL peaks on the second chromosome (1.63 cM, 20.87 cM, and  
302 134.26 cM) (Figure 3, Table 2) that contributed significantly to the sterility phenotype when included  
303 in the multiple imputation QTL model (see *Multiple Imputation*, below, and Table 4). The second  
304 chromosome peak at 1.63 cM (QTL “2R-A”) was present in the full and *An. quadriannulatus* X  
305 datasets, but not the *An. coluzzii* X dataset (Figure 3). QTL “2L” at 134.26 cM was present in the full  
306 and *An. coluzzii* X datasets, but not the *An. quadriannulatus* X dataset. Finally, QTL “2R-B” (20.87  
307 cM) was found in the full and both X chromosome split datasets, suggesting that it contains loci  
308 involved in autosomal-autosomal incompatibilities (Figure 3). While additional LOD peaks are present  
309 in the *An. coluzzii* X dataset, these were non-significant when included in the multiple imputation QTL  
310 model (see *Multiple Imputation*, below ) (Figure 3). None of the second chromosome QTL overlap  
311 with those found in the *An. coluzzii* × *An. arabiensis* cross (Slotman et al., 2004) (Figure 3, Table 2).

312 Two QTL were identified on the third chromosome at 53.95 (QTL “3L-A”) and 67.46 cM (QTL  
313 “3L-B”) (Figure 3, Table 2). These are both present in the full and *An. quadriannulatus* X dataset, but  
314 not the *An. coluzzii* X dataset, indicating that *An. coluzzii* introgressions into a predominantly *An.*  
315 *quadriannulatus* genetic background are driving this signal. QTL “3L-A” in the *An. coluzzii* × *An.*  
316 *quadriannulatus* dataset overlaps with a QTL in the *An. coluzzii* × *An. arabiensis* dataset (Slotman *et*  
317 *al*, 2004) (Figure 3, Table 2). The 3L-A and 3L-B QTL have seemingly additive-only effects on sterility  
318 (see *Multiple Imputation*, below); these QTL were not identified by CIM in the *An. coluzzii* X dataset,  
319 suggesting that they result only from *An. coluzzii* introgressions into predominantly *An.*  
320 *quadriannulatus* genetic backgrounds. However, only three hybrid males were sampled that are *An.*  
321 *quadriannulatus* 3L-B homozygous and inherited the *An. coluzzii* X (Figure 4), and each had a sterility  
322 score of five or six. No hybrid males were sampled that are *An. quadriannulatus* 3L-A homozygous  
323 and inherited the *An. coluzzii* X. The reduction (or absence) of homozygous genotypes at the 3L-A and  
324 3L-B QTL differs significantly from expectation (the percentage of homozygous genotypes across all

325 autosomal loci, assuming HWE) (Table 3). Thus, these regions of the *An. quadriannulatus* genome  
326 interact epistatically with the X and result in almost complete male inviability when introgressed into  
327 an *An. coluzzii* genetic background.

### 328 *Multiple Imputation*

329 CIM detects QTL by calculating LOD scores at each marker or map location along each  
330 chromosome and does this agnostic of other QTL contributions to the phenotype and potential epistatic  
331 interactions between QTL. Due to this limitation, we built multiple imputation QTL models to detect  
332 the significance of all QTL LOD peaks found during CIM of the full (i.e., not split by X chromosome)  
333 dataset. The QTL discussed above, and those reported in Table 2, are only those that contributed  
334 significantly to the variance in sterility in the multiple imputation models described herein. We report  
335 two QTL models, one that considers only additive effects of QTL on sterility, and one which includes  
336 significant epistatic effects between QTL. We took an iterative process during testing QTL models and  
337 added QTL locations identified through CIM in a stepwise fashion. After we had identified those that  
338 had significant additive effects, we tested all pairwise epistatic effects between these loci. The final  
339 “additive only” and “epistasis allowed” models explain 71.66% and 72.29% of the variance in sterility,  
340 respectively (Table 4). The vast majority of this variance is explained by the inheritance of the X  
341 chromosome. As expected, individuals harboring the *An. coluzzii* X chromosome have on average  
342 higher sterility scores because in these backcrosses there are more opportunities for *An.*  
343 *quadriannulatus* autosomal – *An. coluzzii* X incompatibilities than vice versa (Figure 4).

344 Each of the QTL described had a significant additive effect in both the “additive only” and  
345 “epistasis allowed” models (F-test p-value < 0.01) (Table 4). After testing all possible pair-wise  
346 interactions between these loci, we found that only the X and 2L (134.26 cM) QTL pair had a  
347 significant interaction (F-test p-value = 5.60E-06). In both models, additive effects of autosomal loci,  
348 and the epistatic interaction between the X and 2L QTL, each explained less than 1% of the variance

349 in hybrid sterility. The “epistasis allowed” model explained a higher proportion of the variance and  
350 had a higher model LOD (225.78) when compared to the “additive only” model (221.25) (Table 4).

351 To better understand the direction of the effect of each QTL in the full dataset, we compared  
352 the phenotypes of each individual given their genotype (*An. quadriannulatus* homozygous (QQ) vs.  
353 *An. quadriannulatus/An. coluzzii* heterozygous (QC)) at autosomal QTL and the X chromosome  
354 (Figure 5). Each autosomal locus increases sterility in the heterozygous state, and individuals with the  
355 *An. coluzzii* X are significantly more sterile. The interaction plot (Figure 5, “X vs 2L”, right panel)  
356 between the X and 2L QTL demonstrates that heterozygosity at the 2L QTL alone does not impact  
357 sterility when an individual has the *An. quadriannulatus* X, but reduces sterility when inherited with  
358 the *An. coluzzii* X. The evidence suggests that each autosomal QTL indicate the location of a (partially)  
359 dominant *An. coluzzii* sterility gene that causes incompatibilities with the *An. quadriannulatus*  
360 background.

361 We determined the 1.5 LOD interval of each QTL and, using the base pair positions of our SNP  
362 markers, determined the physical map span of each (Table 2). Next, we compared QTL locations to  
363 male sterility QTL found in a *An. coluzzii* × *An. arabiensis* cross (Figure 3) (Slotman et al., 2004). We  
364 re-analyzed this data using CIM with three marker covariates. No significant QTL on the second  
365 chromosome overlap between these crosses. However, the 3L-A QTL in our *An. coluzzii* × *An.*  
366 *quadriannulatus* cross falls within the 3L QTL from the *An. coluzzii* × *An. arabiensis* cross, and the  
367 3L-B QTL overlaps it. In the Slotman et al. (2004) data the third chromosome QTLs are also only  
368 present when the hybrid has the backcross (*An. arabiensis* in this case) parent X chromosome (Figure  
369 3). Thus, interestingly this represents a region of the *An. coluzzii* that contributes to sterility when  
370 introgressed into both *An. quadriannulatus* and *An. arabiensis* genetic backgrounds.

### 371 *Candidate Speciation Genes*

372 We identified all annotated genes in the AgamP4 genome within the 1.5 LOD intervals of each  
373 QTL using VectorBase ([www.vectorbase.org](http://www.vectorbase.org)) and found the protein family (if available) of each gene

374 using PANTHER. Due to the lack of resolution on the X chromosome, we excluded this chromosome  
375 from this analysis. We identified 349 genes within all autosomal QTL (2.47 Mb total, Table 2). We  
376 identified ten genes with protein functions related to mating, reproduction, testes, and microtubule  
377 morphogenesis and function (Table 5) in the full gene set (Table S1).

378 We performed a protein network analysis on the entire gene list using STRING (Szklarczyk et  
379 al. 2019). The full STRING protein interaction results can be found in Supplementary File 1. Many  
380 protein products of genes in autosomal QTL regions have direct interactions, and four proteins with  
381 functions related to reproduction (bold in Table 5) interact directly in an insular protein network:  
382 dynein light chain Tctex-type, intra-flagellar transport protein 74 homolog, tubulin-specific chaperone  
383 D, and cytoplasmic dynein 2 heavy chain 1.

384

## 385 Discussion

386 One or more loci on the X chromosomes of both species have a large impact on hybrid male  
387 sterility in the *An. coluzzii* × *An. quadriannulatus* hybrids. In both multiple imputation QTL models  
388 presented (with and without X by 2L epistasis) the cumulative effect of the X chromosome accounted  
389 for greater than 60 % of the phenotypic variation. These results support the theory of large X effect on  
390 hybrid male sterility due to its hemizyosity in the heterogametic sex (*Anopheles* males) where  
391 recessive sterility genes are expressed, but cannot discount the role of faster X evolution, which we did  
392 not test. The large proportion of variance explained by the X in our *An. coluzzii* × *An. quadriannulatus*  
393 backcross contrasts with the *An. coluzzii* × *An. arabiensis* backcross (to *An. arabiensis*) performed by  
394 Slotman et al. (2004). Slotman et al. (2004) found that the X chromosome accounted for only 4.7% of  
395 the variance in the hybrid male sterility phenotype while each of five autosomal QTL accounted for  
396 3.4% to 20.3% of the variance (Table 4, Slotman et al., 2004). However, the relatively small proportion  
397 of the variance explained by the X in the *An. coluzzii* × *An. arabiensis* backcross resulted, at least in



398 part, from the inviability observed when hybrids inherited the *An. coluzzii* X (only 9.7% of hybrid  
399 males inherited the *An. coluzzii* X, Table 1 of Slotman et al., 2004).

400 When *An. coluzzii* × *An. arabiensis* F1 hybrids were backcrossed to *An. coluzzii*, the X  
401 accounted for 39.5% of the variance and additive effects of autosomal QTL accounted for 4.2-7.9% of  
402 the variance (Slotman et al., 2004). The differences in the effect size of the X between crosses, and  
403 directions of a back cross between two species (Slotman et al., 2004) is not unexpected. First, the X  
404 chromosome has different effects on inviability in each direction of a cross. Second, the genetic  
405 architecture of DMIs are unique to each species pair. Additionally, DMIs accumulate over time faster  
406 than linearly, and the genetic architecture of individual DMIs becomes more complex as additional  
407 mutations accumulate (Matute et al., 2010; Matute and Gavin-Smyth, 2014, Moyle and Nakazato,  
408 2010, Orr and Turelli, 2001).

409 Unfortunately, due to the *Xag* inversion, the entire X chromosome is effectively one QTL, and  
410 we have limited resolution to identify candidate genes on this chromosome. While the 1.5 LOD interval  
411 of the X chromosome QTL is 8.53 Mb, the entire span of the QTL is 14.2 Mb, or 58% of the X  
412 chromosome. However, we determined which autosomal *An. coluzzii* loci contributed to sterility when  
413 introgressed into a predominantly *An. quadriannulatus* genomic background, and vice versa, by  
414 dividing the dataset by the parental origin of the X chromosome. This analysis revealed that the  
415 epistatic interaction between the 2L and the X QTL is driven by the interaction between *An.*  
416 *quadriannulatus* QTL 2L homozygotes and the hemizygous *An. coluzzii* X chromosome (Figures 3,  
417 4). Individuals with this genotype combination are among the most sterile in the cross (Figure 4), and  
418 the 2L QTL is absent in the *An. quadriannulatus* X chromosome CIM results (Figure 3).

419 The 3L-A QTL sterility QTL in our *An. coluzzii* × *An. quadriannulatus* cross overlaps entirely  
420 with the 3L QTL identified in the *An. coluzzii* × *An. arabiensis* cross (backcrossed to *An. arabiensis*,  
421 Figure 2.D of Slotman et al., 2004). No *An. arabiensis* homozygotes were sampled in this region when  
422 the hybrid inherited the *An. coluzzii* X chromosome. Thus, the *An. coluzzii* X chromosome interacts

423 epistatically with this same region of 3L in both *An. quadriannulatus* and *An. arabiensis* to contribute  
424 to hybrid male sterility. We hypothesize that the 3L-A QTL harbors an ancestral allele that is shared  
425 between *An. quadriannulatus* and *An. arabiensis* that has not been subjected to introgression between  
426 *An. coluzzii* and *An. arabiensis*.

427         Due to the rapid radiation of the *Anopheles gambiae* species complex, incomplete lineage  
428 sorting, and ongoing introgression between member species via fertile F1 hybrid females, the topology  
429 of the species complex phylogeny, which is based upon the X chromosome, is discordant with the  
430 whole-genome topology (Figure 1 of Fontaine et al., 2015). Bi-directional introgression between *An.*  
431 *arabiensis* and the ancestor of *An. gambiae s.s.* + *An. coluzzii* has reduced the genetic distance between  
432 the autosomes of these species relative to the X chromosome. As a result, *An. arabiensis* is sister to  
433 *An. quadriannulatus* in the X chromosome phylogeny but is sister to *An. gambiae s.s.* + *An. coluzzii* in  
434 the whole genome phylogeny.

435         While gene tree phylogenies vary across the genome due to the reasons outlined above, on the  
436 3L, where we find overlap of sterility QTL between *An. quadriannulatus* and *An. arabiensis* crosses,  
437 the most commonly found gene phylogenies are those that group *An. arabiensis* closer to *An. coluzzii*  
438 than *An. quadriannulatus* (Figure 3 of Fontaine et al., 2015). If we assume that genes involved in post-  
439 zygotic reproductive isolation between this species trio evolved first on the X chromosome between  
440 the ancestor of *An. gambiae s.s.* + *An. coluzzii* and the ancestor of *An. arabiensis* + *An.*  
441 *quadriannulatus*, we can hypothesize that the 3L-A QTL shared between these crosses may have an X  
442 chromosome-like topology despite the homogenizing effect of introgression between the *An. coluzzii*  
443 and *An. arabiensis* autosomes. This topology is found in ~12.6% of 50-kb genomics windows on the  
444 3L (Figure 3 of Fontaine et al., 2015; see “other, A+Q trees”).

445         Our hypothesis that the 3L-A by X chromosome DMI may have been the first to arise between  
446 the ancestor of *An. gambiae s.s.* + *An. coluzzii* and the ancestor of *An. arabiensis* + *An. quadriannulatus*  
447 can be tested in the following ways. First, this sterility QTL should also exist in a cross between *An.*

448 *gambiae s.s.* and *An. arabiensis* or *An. quadriannulatus*, and second, it should be absent in a cross  
449 between *An. arabiensis* and *An. quadriannulatus*. No hybrid sterility or inviability exists between *An.*  
450 *coluzzii* and its sister species *An. gambiae s.s.*, so we expect that the same loci will be responsible for  
451 reproductive isolation between both of these species and either *An. arabiensis* or *An. quadriannulatus*.  
452 A cross between *An. arabiensis* and *An. quadriannulatus* may yield more interesting results; it would  
453 help us to understand the order by which individual DMI arose between these species pairs, and how  
454 this effects our understanding of the “snowball effect” of DMI evolution in the context of rapidly  
455 radiating species. For example, while the 3L-A by X chromosome DMI has been maintained between  
456 *An. coluzzii* and both *An. arabiensis* and *An. quadriannulatus*, additional DMI may have evolved in a  
457 “snowball effect” type scenario between *An. coluzzii* and *An. quadriannulatus*, where there is no  
458 evidence historical autosomal introgression (Fontaine et al., 2015), whereas DMI may have been lost  
459 as a result of autosomal introgression between *An. coluzzii* and *An. arabiensis*, or their relative rate of  
460 evolution may have been slower.

461 Our candidate sterility gene analysis identified seven genes (out of 349) within autosomal *An.*  
462 *coluzzii* × *An. quadriannulatus* hybrid male sterility QTL that had protein functions related to tubulin  
463 or microtubule biogenesis, structure, or function. Four of these (AGAP004782, AGAP001219,  
464 AGAP010790, and AGAP001229) have experimentally determined, direct interactions with each  
465 other, while another interaction is predicted due to co-expression (AGAP004724 and AGAP010790)  
466 (Table 5, Supplementary File 1). While these genes are found within autosomal QTL that contribute to  
467 a small proportion of variation in the sterility phenotype, one or more could have an interaction with  
468 an X chromosome locus that is disrupted during hybrid testes morphogenesis and/or spermatogenesis.  
469 In *Drosophila*, spermatogenesis progresses through mitosis of germ cells, meiosis, and finally the  
470 differentiation of spermatids into mature sperm (White-Cooper et al., 2009). Infertility in *Drosophila*  
471 hybrid males is associated with spermiogenic (post- rather than pre-meiotic) failure associated with  
472 sperm individualization and maturation (Wu et al., 1992). Recent work in the *Anopheles gambiae*

473 complex demonstrates that hybrid sterility results in part from pre-meiotic arrest in degenerate testes  
474 (Liang et al, 2019).

475 Sperm flagellum elongate from the spermatid head after meiosis. The axoneme is the central  
476 component of the sperm flagellum and has a 9+2 structure of a central pair of microtubules surrounded  
477 by nine doublet microtubules. Doublet microtubules have an inner and outer dynein arm that serve to  
478 attach and detach to neighboring doublet microtubules, and function in the motor activity of the  
479 flagellum. The axoneme is surrounded by a mitochondrial sheath that serves to provide ATP and power  
480 motor activity. Tektins are located near the junction points of dynein arms and neighboring  
481 microtubules (Gagon, 1995; Linck et al., 2016). Seven of the ten reproduction genes have PANTHER  
482 protein functions related to tubulin or microtubule biogenesis, structure, or function: gamma-tubulin  
483 complex component 5, microtubule-associated protein futsch, tubulin-like protein alpha-4B-related,  
484 dynein light chain Tctex-type, intra-flagellar transport protein 74 homolog, tubulin-specific chaperone  
485 D, and cytoplasmic dynein 2 heavy chain 1. The latter five genes (bold, Table 5) in this list have direct  
486 interactions in the STRING protein interaction network, and may represent a candidate genetic pathway  
487 whose disruption results in hybrid male sterility in the *An. coluzzii* × *An. quadriannulatus* cross.  
488 Interestingly, another tubulin-specific chaperone, E-like, is required for sperm individualization and  
489 male fertility in *Drosophila* (Nuwal et al., 2012).

490 The three genes without tubulin/microtubule functions are: transcription factor ken, protein  
491 lingerer, and a checkpoint protein Hus1-like. Mutations in the ken and barbie transcription factor result  
492 in malformed genitalia in *Drosophila* (Lukacsovich et al., 2003). lingerer encodes a putative RNA  
493 binding protein and *Drosophila* lingerer mutant males fail to withdraw their genitalia after copulation  
494 (Kuniyoshi et al., 2002). Finally, Hus1-like is a component of the 9-1-1 checkpoint protein complex,  
495 which coordinates DNA damage sensing, cell cycle progression, and DNA repair (Cotta-Ramusino et  
496 al., 2010). Future analyses of the molecular evolution of these genes and their regulatory regions

497 between member species of the *An. gambiae* complex may yield insight into the specific alleles  
498 responsible for hybrid male sterility between *An. coluzzii*, *An. quadriannulatus*, and *An. arabiensis*.

499 In this study we have determined that the X chromosome accounts for that majority of the  
500 variance in the hybrid male sterility phenotype in a cross between *An. coluzzii* and *An. quadriannulatus*.  
501 We have also narrowly defined autosomal QTL which have a statistically significant contribution to  
502 sterility despite their smaller effect sizes in comparison to the X. The shared, autosomal sterility QTL  
503 between the *An. coluzzii* × *An. quadriannulatus* and *An. coluzzii* × *An. arabiensis* backcrosses suggest  
504 that these may represent important autosomal regions involved in the post-zygotic reproductive  
505 isolation of *An. coluzzii* from its sister species that diverged early in the radiation of the *An. gambiae*  
506 species complex. Future analyses into factors contributing to female hybrid sterility in the *An. coluzzii*  
507 × *An. quadriannulatus* cross will add to our knowledge of the genetics of speciation in this  
508 evolutionarily and medically important group of human malaria mosquitoes.

509

## 510 **References**

- 511 Andolfatto, P., Davison, D., Erezyilmaz, D., Mast, J., Sunayama-Morita, T., and Stern, D.L. (2011).  
512 Multiplexed shotgun genotyping for rapid and efficient genetic mapping. *Genome Res.* 21,  
513 610-617.
- 514 Bakker, E.G., Toomajian, C., Kreitman, M., and Bergelson, J. (2006). A genome-wide survey of *R*  
515 gene polymorphisms in *Arabidopsis*. *The Plant Cell* 18, 1803-1818.
- 516 Bolger, A.M., Lohse, M., and Usadel, B. (2014). Trimmomatic: A flexible trimmer for Illumina  
517 Sequence Data. *Bioinformatics*, btu170.
- 518 Bomblies, K., Lempe, J., Epple, P., Warthmann, N., Lanz, C., Dangle, J.L., and Weigel, D. (2007).  
519 Autoimmune response as a mechanism for Dobzhansky-Muller-type incompatibility  
520 syndrome in plants. *PLoS Biology* 5, e236.
- 521 Bomblies, K., and Weigel, D. (2007). Hybrid necrosis: autoimmunity as a potential gene-flow barrier  
522 in plant species. *Nature Reviews Genetics* 8, 382-393.
- 523 Broman, K.W., Wu, H., Sen, S., and Churchill, G.A. (2003). R/qtl: QTL mapping in experimental  
524 crosses. *Bioinformatics* 19, 889-890.
- 525 Charlesworth, B., Coyne, J.A., and Barton, N.H. (1987). The relative rates of evolution of sex  
526 chromosomes and autosomes. *The American Naturalist* 130, 113-146.
- 527 Cotta-Ramusino, C., McDonald, E.R., Hurov, K., Sowa, M.E., Harper, J.W., and Elledge, S.J.  
528 (2010). A DNA damage response screen identifies RHINO, a 9-1-1 and TopBP1 interacting  
529 protein required for ATR signaling. *Science* 332, 1313-1317.
- 530 Coyne, J.A., and Orr, H.A. (2004). Speciation. Sinauer Associates, Sunderland, MA. 545 pp.
- 531 Dekker, T., and Takken, W. (1998). Responses of *Anopheles arabiensis* Patton and *Anopheles*  
532 *quadriannulatus* Theobald to carbon dioxide, a man and a calf. *Medical and Veterinary*  
533 *Entomology* 12, 136-140.
- 534 Dobzhansky, T. (1936). Studies on hybrid sterility, II. Localization of sterility factors in *Drosophila*

- 535 *Pseudoobscura* hybrids. *Genetics* 146, 239-244.
- 536 Dobzhansky, T. (1937). *Genetics and the Origin of Species*. New York: Columbia University Press.
- 537 Fontaine, M.C., Pease, J.B., Steele, A., Waterhouse, R.M., Neafsey, D.E., Sharakhov, I.V., *et al.*  
538 (2015). Extensive introgression in a malaria vector species complex revealed by  
539 phylogenomics. *Science* 347, 1258524-1-6.
- 540 Gagon, C. (1995). Regulation of Sperm Motility at the Axonemal Level. *Reproductive Fertility and*  
541 *Development* 7, 847-855.
- 542 Gibson, G. (1996). Genetics, ecology and behaviour of anophelines. *Olfaction in Mosquito-Host*  
543 *Interactions* (ed. by G. R.Bock and G.Cardew)., pp. 22–45. Ciba Foundation Symposium 200.  
544 John Wiley & Sons, Chichester.
- 545 Graze, R.M., Novelo, L.L., Amin, V., Fear, J.M., Casella, G., Nuzhdin, S.V., and McIntyre, L.M.  
546 (2012). Allelic imbalance in *Drosophila* hybrid heads: exons, isoforms, and evolution.  
547 *Molecular Biology and Evolution* 29, 1521-1532.
- 548 Hackett, C., and Broadfoot, L. (2003). Effects of genotyping errors, missing values, and segregation  
549 distortion in molecular marker data on the construction of linkage maps. *Heredity* 90, 33-38.
- 550 Hollocher, H., and Wu, C.I. (1996). The genetics of reproductive isolation in the *Drosophila*  
551 *simulans* clade: X vs. autosomal effects and male vs. female effects. *Genetics* 143, 1243-  
552 1255.
- 553 Holt, R.A., *et al.* (2002). The genome sequence of the malaria mosquito *Anopheles gambiae*. *Science*  
554 298, 129-149.
- 555 Hunt, R.H., Coetzee, M., and Fettene, M. (1998). The *Anopheles gambiae* complex: a new species  
556 from Ethiopia. *Transactions of The Royal Society of Tropical Medicine and Hygiene* 92, 231-  
557 235.
- 558 Kalirad, A., and Azevedo, R.B.R. (2017). Spiraling complexity: A test of the snowball effect in a  
559 computational model of RNA folding. *Genetics* 206, 377-388.

- 560 Kirkpatrick, M., and Hall, D.W. (2004). Male-biased mutation, sex linkage, and the rate of adaptive  
561 evolution. *Evolution* 58, 437-440.
- 562 Kosambi, D.D. (1943). The estimation of map distances from recombination values. *Annals of*  
563 *Eugenics* 12, 172-175.
- 564 Kuniyoshi, H., Baba, K., Ueda, R., Kondo, S., Awano, W., Juni, N., and Yamamoto, D. (2002).  
565 *lingerer*, a *Drosophila* gene involved in initiation and termination of copulation, encodes a set  
566 of novel cytoplasmic proteins. *Genetics* 162, 1775-1789.
- 567 Kyrou, K., Hammond, A., Galizi, R., Kranjc, N., Burt, A., Beaghton, A.K., Nolan, T., and Crisanti,  
568 A. (2018). A CRISPR–Cas9 gene drive targeting *doublesex* causes complete population  
569 suppression in caged *Anopheles gambiae* mosquitoes. *Nature Biotechnol* 36, 1062–1066.
- 570 Li, H., and Durbin, R. (2009). Fast and accurate short read alignment with Burrows-Wheeler  
571 transform. *Bioinformatics* 25, 1754-1760.
- 572 Li, H., Handsaker, B., Wysoker, A., Fennell, T., Ruan, J., Homer, N., Marth, G., Abecasis, G.,  
573 Durbin, R., and 1000 Genome Project Data Processing Subgroup (2009). The sequence  
574 alignment/map (SAM). format and SAMtools. *Bioinformatics* 25, 2078-2079.
- 575 Liang, J., and Sharakhov, I.V. (2019) Premeiotic and meiotic failures lead to hybrid male sterility in  
576 the *Anopheles gambiae* complex. *Proceedings B* 286, 20191080.
- 577 Linck, R.Q., Chemes, H., and Albertini D. (2016). The axoneme: the propulsive engine of spermatozoa  
578 and cilia and associated ciliopathies leading to infertility. *Journal of Assisted Reproduction and*  
579 *Genetics* 33, 141-156.
- 580 Lucchesi, J.C., and Suzuki, D.T. (1968). The interchromosomal control of recombination. *Annual*  
581 *Review of Genetics* 2, 53-86.
- 582 Lukacsovich, T., Yuge K., Awano W., Asztalos Z., Kondo S., Juni N., and Yamamoto, D. (2003).  
583 The *ken and barbie* gene encoding a putative transcription factor with a BTB domain and



- 584 three zinc finger motifs functions in terminalia development of *Drosophila*. *Archives of Insect*  
585 *Biochemistry and Physiology* 54, 77-94.
- 586 MacNair, M.R. (1983). The genetic control of copper tolerance in the yellow monkey flower,  
587 *Mimulus guttatus*. *Heredity* 50, 283-293.
- 588 Macnair, M.R., and Christie, P. (1983). Reproductive isolation as a pleiotropic effect of copper  
589 tolerance in *Mimulus guttatus*? *Heredity* 50, 295-302.
- 590 Maheshwari, S., and Barbash, D.A. (2011). The genetics of hybrid incompatibilities. *Annual Review*  
591 *Genetics* 45, 331-355.
- 592 Mani, G.S., and Clarke, B.C. (1990). Mutational order: a major stochastic process in evolution.  
593 *Proceedings of the Royal Society of London, Biology* 240, 29-37.
- 594 Masley, J.P., Jones, C.D., Noor, M.A.F., Locke, J., and Orr, H.A. (2006). Gene transposition as a  
595 cause of hybrid sterility in *Drosophila*. *Science* 313, 1448-1450.
- 596 Matute, D.R., Butler, I.A., Turissini, D.A., and Coyne, J.A. (2010). A test of the snowball theory for  
597 the rate of evolution of hybrid incompatibilities. *Science* 329, 1518-1521.
- 598 Matute, D.R., and Gavin-Smyth, J. (2014). Fine mapping of dominant X-linked incompatibility  
599 alleles in *Drosophila* hybrids. *PLoS Genetics* 11, e1005558.
- 600 Mi, H., Muruganujan, A., Huang, X., Ebert, D., Mills, C., Guo, X., and Thomas, P.D. (2019)  
601 Protocol Update for large-scale genome and gene function analysis with the PANTHER  
602 classification system (v.14.0). *Nature Protocols* 14, 703-721.
- 603 Moyle, L.C., and Nakazato, T. (2010). Hybrid incompatibility “snowballs” between *Solanum* species.  
604 *Science* 329, 1521-1523.
- 605 Müller, H.J. (1940). Bearing of the *Drosophila* work on systematics. In *The New Systematics*, ed. JS  
606 Huxley, pp. 185-268. Oxford, UK. Clarendon Press.
- 607 Nosil, P., and Flaxman, S.M. (2011). Conditions for mutation-order speciation. *Proceedings of the*  
608 *Royal Society of London, Biology* 278, 399-407.

- 609 Nuwal, T., Kropp, M., Wegener, S., Racic, S., Montalban, I., and Buchner, E. (2012). The *Drosophila*  
610 homologue of tubulin-specific chaperon E-like protein is required for synchronous sperm  
611 individualization and normal male fertility. *Journal of Neurogenetics* 26, 374-381.
- 612 Orr, H.A., and Coyne, J.A. (1989). The genetics of postzygotic isolation in the *Drosophila virilis*  
613 group. *Genetics* 121, 527-537.
- 614 Orr, H.A., and Irving, S. (2005). Segregation distortion in hybrids between the Bogota and USA  
615 subspecies of *Drosophila pseudoobscura*. *Genetics* 169, 671-682.
- 616 Orr, H.A. (1995). The population genetics of speciation: the evolution of hybrid incompatibilities.  
617 *Genetics* 139, 1805–1813.
- 618 Orr, H.A., and Turelli, M. (2001). The evolution of postzygotic isolation: accumulating Dobzhansky-  
619 Muller incompatibilities. *Evolution* 55, 1085-1094.
- 620 Pates, H.V., Takken, W., Curtis, C.F., Huisman, W., Akinpelu, O., and Gill, G.S. (2001b).  
621 Unexpected anthropophagic behavior in *Anopheles quadriannulatus*. *Medical and Veterinary*  
622 *Entomology* 15, 293-298.
- 623 Pates, H.V., Takken, W., Stuke, K., and Curtis, C.F. (2001a). Differential behaviour of *Anopheles*  
624 *gambiae sensu stricto* (Diptera: Culicidae) to human and cow odours in the laboratory.  
625 *Bulletin of Entomological Research* 4, 289-296.
- 626 Phadnis, N., and Orr, H.A. (2009). A single gene causes both male sterility and segregation distortion  
627 in *Drosophila* hybrids. *Science* 323, 376-379.
- 628 Presgraves, D.C., and Orr, H.A. (1998). Haldane's rule in taxa lacking a hemizygous X. *Science* 282,  
629 952-954.
- 630 Schultz, J., and Redfield, H. (1951). Interchromosomal effects on crossing over in *Drosophila*. *Cold*  
631 *Spring Harbor Symposium on Quantitative Biology* 16, 175-197.
- 632 Sen, S., Churchhill, G.A. (2001). A statistical framework for quantitative trait mapping. *Genetics*  
633 159, 371-387.

- 634 Slotman, M.A., Della Torre, A., and Powell, J.R. (2004). The genetics of inviability and male sterility  
635 in hybrids between *Anopheles gambiae* and *Anopheles arabiensis* (2004). *Evolution* 59, 1016-  
636 1026.
- 637 Slotman, M.A., della Torre, A., and Powell, J.R. (2005). Female sterility in hybrids between  
638 *Anopheles gambiae* and *A. arabiensis*, and the cause of Haldane's Rule. *Evolution* 59, 1016-  
639 1026.
- 640 Smith, H.A., White, B.J., Kundert, P., Cheng, C., Romero-Severson, J., Andolfatto, P., and Besansky,  
641 N.J. (2015). Genome-wide QTL mapping of saltwater tolerance in sibling species of  
642 *Anopheles* (malaria vector). mosquitoes. *Heredity* 115, 471-479.
- 643 Stevison, L.S., Hoehn, K.B., and Noor, M.A. (2011). Effects of inversions on within- and between-  
644 species recombination divergence. *Genome Biology and Evolution* 3, 830-841.
- 645 Sun, S., Ting, C.T., and Wu, C.I. (2004). The normal function of a speciation gene, *Odysseus*, and its  
646 hybrid sterility effect. *Science* 305, 81-83.
- 647 Szklarczyk, D., Gable, A.L., Lyon, D., Junge, A., Wyder, S., Huerta-Cepas, J., Simonovic, M.,  
648 Doncheva, N.T., Morris, J.H., Bork, P., Jensen, L.J., and von Mering, C. (2019) STRING  
649 v11: protein-protein association networks with increased coverage, supporting functional  
650 discovery in genome-wide experimental datasets. *Nucleic Acids Res* 47, 607-613.
- 651 Takken, W., and Knols, B.G.J. (1990). Flight behaviour of *Anopheles gambiae* Giles (Diptera:  
652 Culicidae) in response to host stimuli: a windtunnel study. *Proceedings of Experimental and*  
653 *Applied Entomology* 1, 121-128.
- 654 Tao, Y., and Hartl, D.L. (2003). Genetic dissection of hybrid incompatibilities between *Drosophila*  
655 *simulans* and *D. mauritiana*. III Heterogeneous accumulation of hybrid incompatibilities,  
656 degree of dominance, and implications for Haldane's rule. *Evolution* 57, 2580-2598.
- 657 Ting, C.T., Tsaur, S.C., Sun, S., Browne, W.E., Chen, Y.C., Patel, N.H., and Wu, C.I. (2004). Gene  
658 duplication and speciation in *Drosophila*: evidence from the *Odysseus* locus. *Proceedings of*

- 659            *the National Academy of Sciences, USA* 101, 12232-12235.
- 660 True, J.R., Weir, B.S., and Laurie, C.C. (1996). A genome-wide survey of hybrid incompatibility  
661            factors by the introgression of marked segments of *Drosophila mauritiana* chromosomes into  
662            *Drosophila simulans*. *Genetics* 142, 819-837.
- 663 White, G.B. (1974). Anopheles gambiae complex disease transmission in Africa. *Transactions of the*  
664            *Royal Society of Tropical Medicine & Hygiene* 68, 278-298.
- 665 White-Cooper, H., Doggett, K., and Ellis, R.E. (2009). The evolution of spermatogenesis. In: Sperm  
666            Biology: An Evolutionary Perspective (TR Birkhead, DJ Hosken & S Pitnick, eds), 151–183.  
667            Academic Press, Burlington, MA.
- 668 Wu, C.I., Perez, D.E., Davis, A.W., Johnson, N.A., Cabot, E.L., Palopoli, M.F., and Wu, M.L. (1992).  
669            Molecular genetic studies of post-mating reproductive isolation in *Drosophila*. In: Takahata N,  
670            Clark AG (eds). *Molecular Paleo-population Biology*. Springer-Verlag, Berlin, 191–212.
- 671 Wu, C.I., and Beckenback, A.T. (1983). Evidence for extensive genetic differentiation between the  
672            sex-ratio and the standard arrangement of *Drosophila pseudoobscura* and *Drosophila*  
673            *persimilis* and identification of hybrid sterility factors. *Genetics* 105, 71-86.
- 674 Zuo, J., Niu, Y., Cheng, P., Feng, J.Y., Han, S.F., Zhang, Y.H., Shu, G., Wang, Y., Zhang, and Y.M.  
675            (2019). Effect of marker segregation distortion on high density linkage map construction and  
676            QTL mapping in Soybean (*Glycine max* L.). *Heredity* 123, 579–592.
- 677

678 **Conflict of Interest**

679           The authors declare that the research was conducted in the absence of any commercial or  
680 financial relationships that could be construed as a potential conflict of interest.

681 **Author Contributions**

682           K.C. Deitz, W. Takken and M.A. Slotman designed the experiment. K.C. Deitz and M.A.  
683 Slotman, performed the experiment. K.C. Deitz analysed the data. K.C. Deitz and M.A. Slotman  
684 wrote the manuscript. W Takken edited the manuscript.

685 **Funding**

686           This study was funded by a National Science Foundation Doctoral Dissertation Improvement  
687 Grant (award # 1601675) to K.C. Deitz and M.A. Slotman, a Texas A&M University Genomics Seed  
688 Grant to K.C. Deitz and M.A. Slotman, and a Texas A&M University Dissertation Fellowship to  
689 K.C. Deitz.

690 **Acknowledgments**

691           We thank Patrick Reilly and Andrew Taverner for helpful discussions regarding the analysis  
692 of the dataset and Leon Westerd for assistance with mosquito rearing. We are also thankful to BEI  
693 Resources for providing mosquito strains.

694 **Supplementary Material**

695           Supplementary tables can be found in Deitz\_et\_al\_2020\_Supplementary\_Tables.docx.

696 **Data Availability Statement**

697           Raw, whole-genome sequencing data of mosquito colonies used in this study to generate  
698 pseudo-references are available on the NCBI Sequence Read Archive at project accession number  
699 PRJNAXXXXX (data will be uploaded upon acceptance of the manuscript). Genotype data for  
700 hybrids can be accessed on Dryad (<https://doi.org/XX.XXXX/dryad.XXXXX>) (data will be uploaded  
701 upon acceptance of the manuscript).

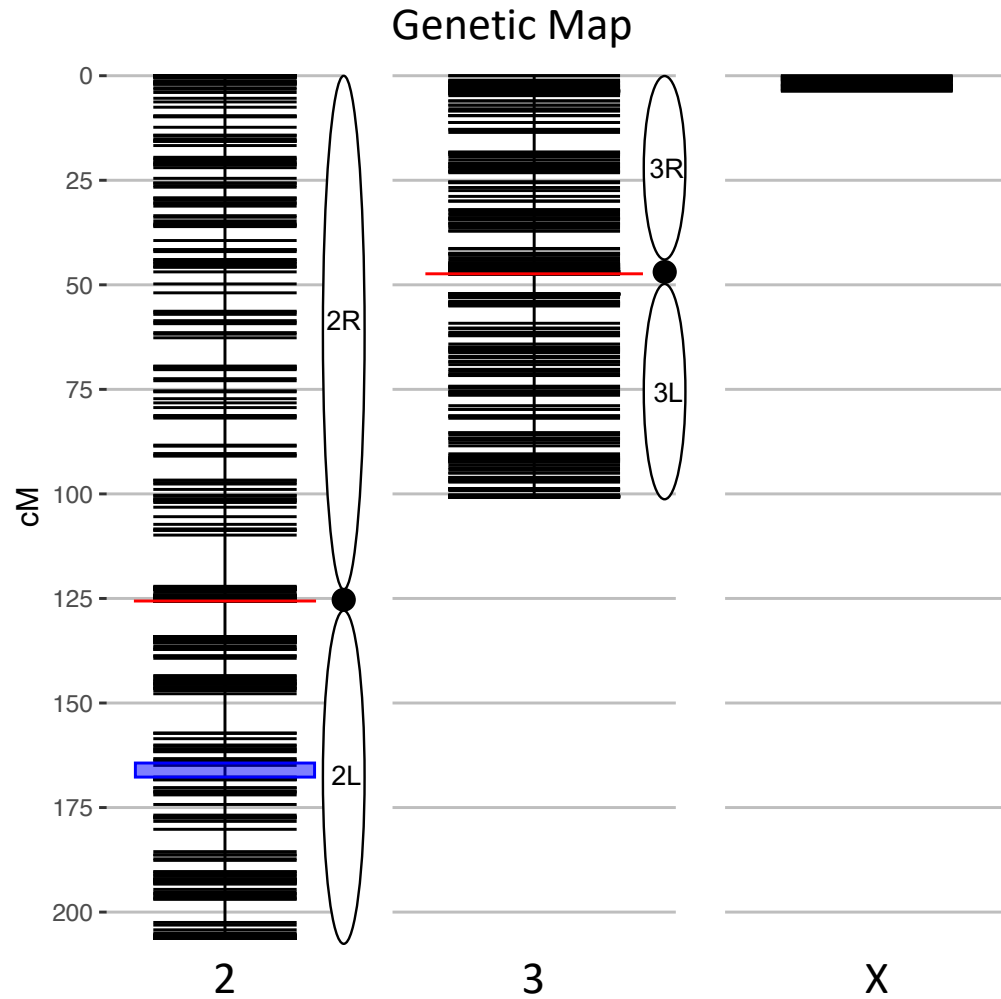

703  
 704 **Figure 1.** Genetic map of the *An. coluzzii* × *An. quadriannulatus* backcross showing centromere locations (red horizontal lines) and marker  
 705 locations (black horizontal lines). The centromere of the telocentric X chromosome is opposite zero cM. The blue highlighted area on  
 706 chromosome 2 indicates the location of the 2La inversion in *An. coluzzii*.

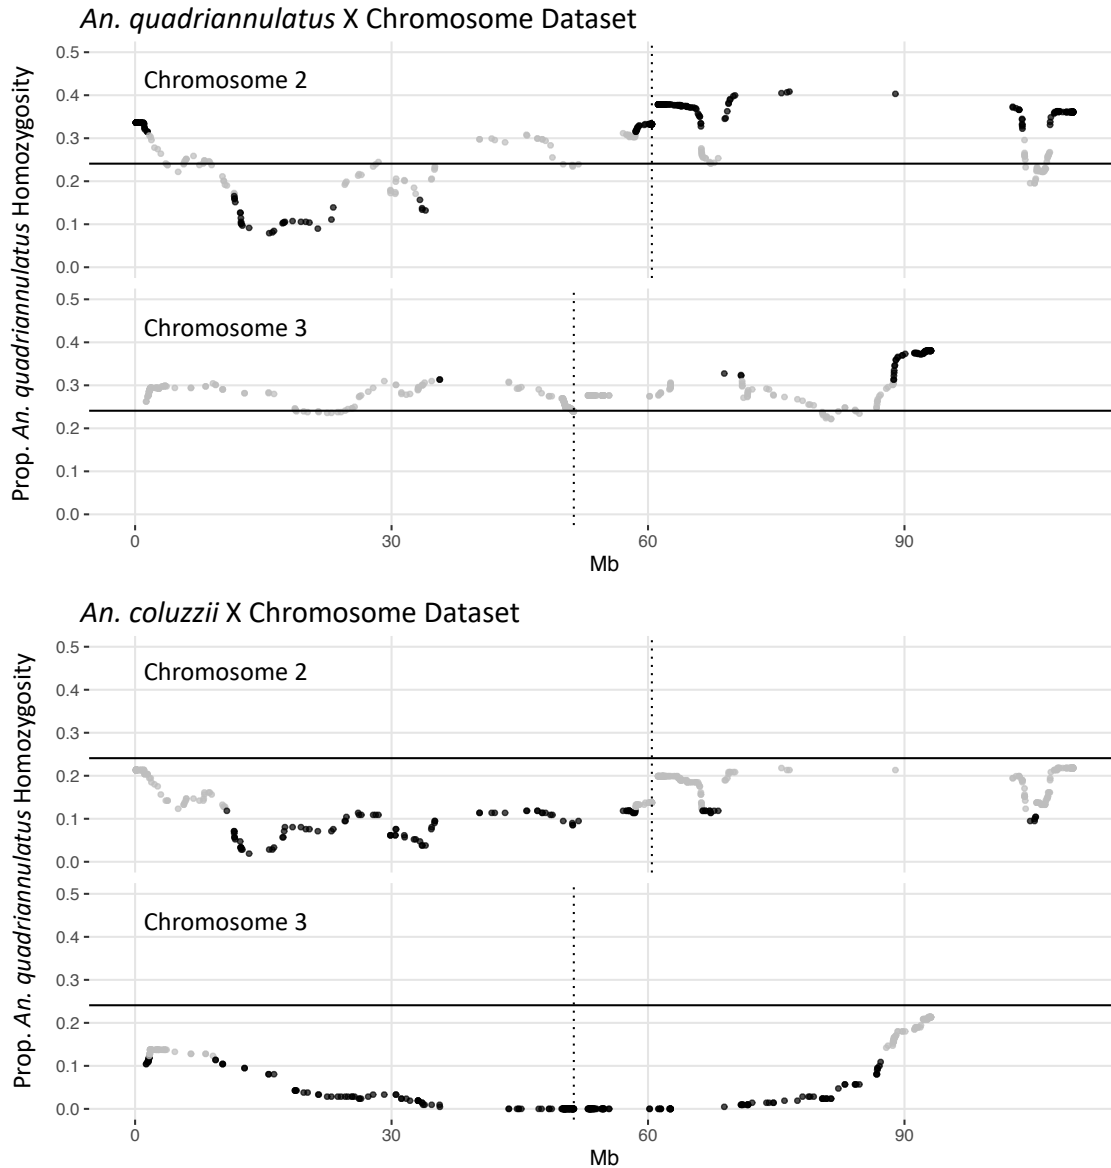

707  
708  
709  
710

**Figure 2.** Segregation distortion at chromosome 2 and 3 loci for the *An. quadriannulatus* X chromosome (top) and *An. coluzzii* X chromosome dataset (bottom). Grey dots indicate SNPs that do not deviate significantly from the expected proportion of homozygosity (solid horizontal line), while black dots deviate significantly (chi-square  $p\text{-val} < 0.05$ ). Vertical dotted lines indicate centromere locations.

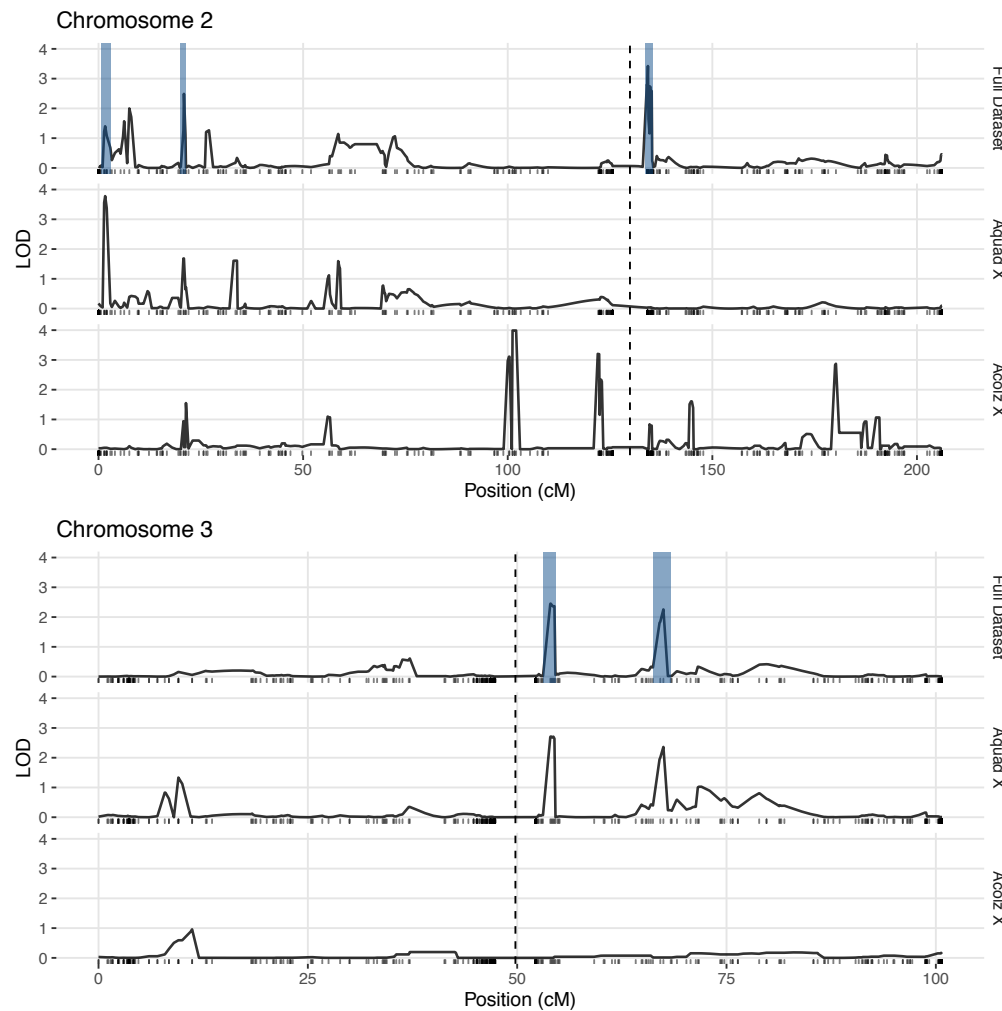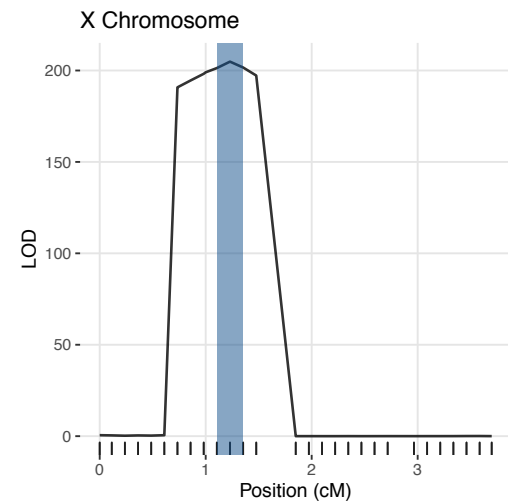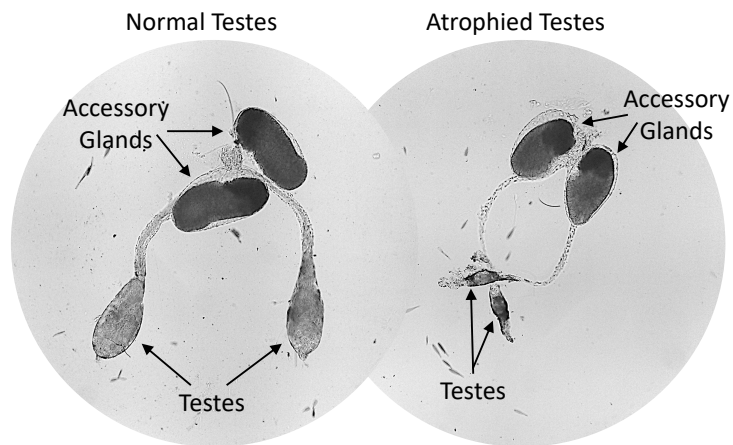

711  
712  
713  
714  
715  
716  
717  
718

**Figure 3.** LOD plots for hybrid male sterility QTL identified with composite interval mapping in the *An. coluzzii* × *An. quadriannulatus* cross. Note the differences in the y-axis scales between the chromosome 2 (top left) and 3 (bottom left) panels, and the X chromosome panel (top right). Vertical, dashed lines indicate centromere locations on chromosomes 2 and 3. Second and third chromosome right arms are left of the centromere, and left arms are to the right. Vertical blue bars indicate 1.5 LOD intervals of QTL that explain a significant proportion of phenotypic variation in multiple imputation QTL model of the full dataset. The bottom right panel illustrates the gross morphological differences between hybrid testes with a normal sterility score (1) and a atrophied hybrid testes (sterility score = 6) which contain no sperm or only a few sperm with abnormal morphology.



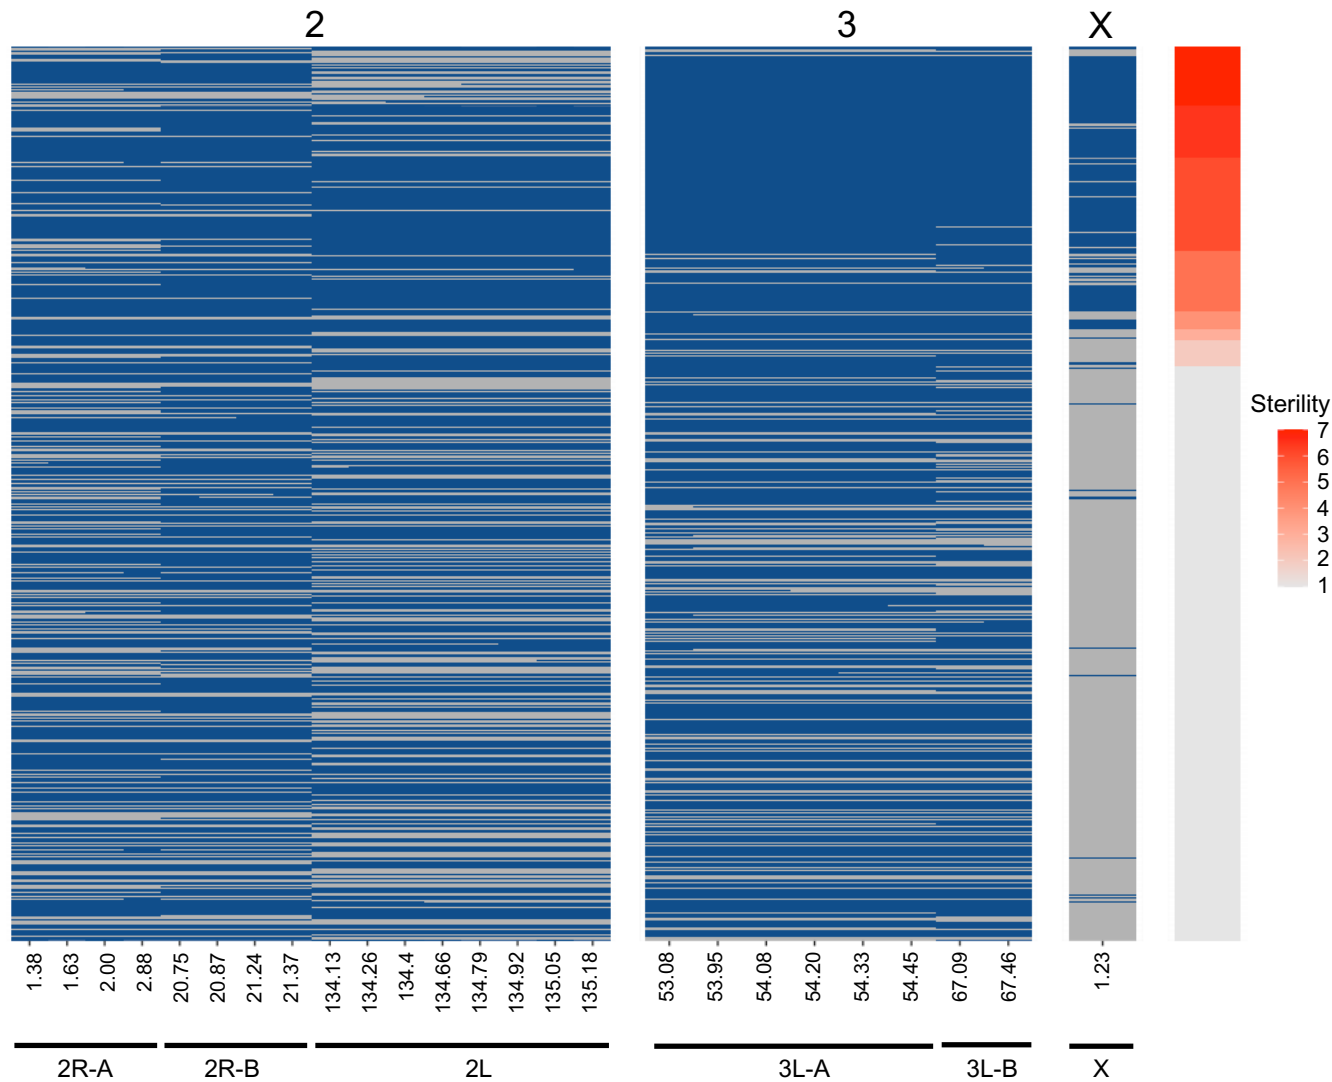

719  
720  
721  
722  
723  
724

**Figure 4.** Genotype heat map for each *An. coluzzii* × *An. quadriannulatus* backcross male hybrid (y-axis) at the six QTL (x-axis) identified using CIM and multiple imputation. All markers within the 1.5 LOD interval of each QTL peak (Table 2) are included (x-axis, positions in cM). Individuals are sorted on the y-axis by sterility, with the individuals with the highest sterility score (7) at the top. Blue cells indicate *Aquad/Acolz* heterozygosity on the autosomes, and *Acolz* hemizyosity on the X chromosome. Grey cells indicate *Aquad/Aquad* homozygosity on the autosomes, and *Aquad* hemizyosity on the X chromosome.

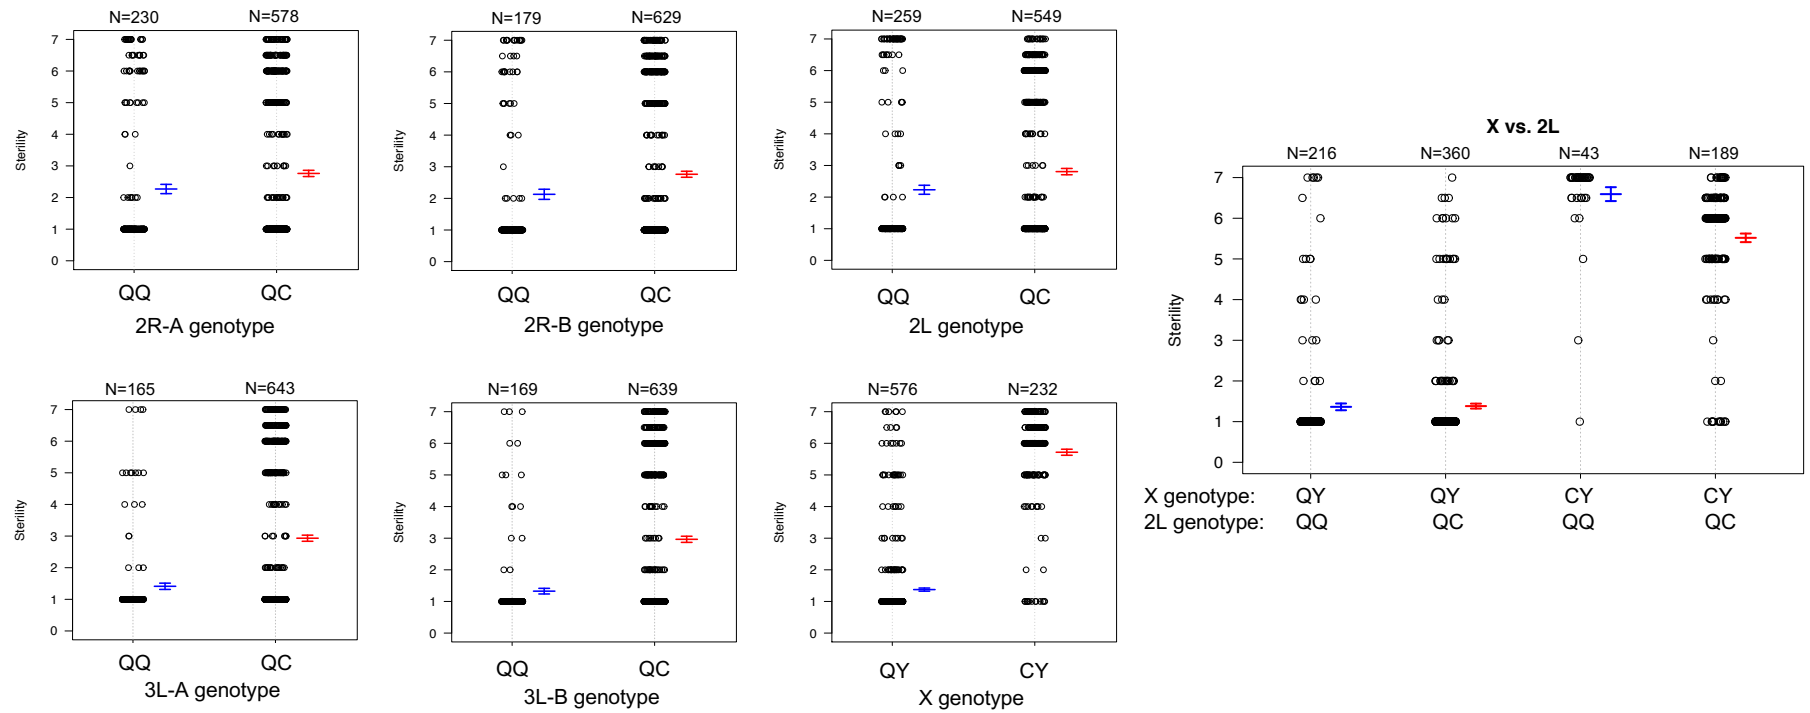

725  
726  
727  
728  
729  
730

**Figure 5.** Genotype (x-axis) by phenotype (sterility score, y-axis) plots for the six QTL identified using CIM and multiple imputation, and an interaction plot (right) for the epistatic effect between the X chromosome and 2L QTL. Each individual is represented as a dot, which are jittered to avoid overlap. Box plots illustrate the mean (middle line) of each phenotype distribution and whiskers illustrate +/- 1 standard error of the mean. QTL names and locations correspond to those in Table 2. QQ: *An. quadriannulatus* homozygous, QC: *An. quadriannulatus* / *An. coluzzii* heterozygous.

731 **Tables**

732

733 **Table 1.** The number of ancestry informative, thinned, and non-duplicate markers genotyped in hybrids, and the physical and map distances  
734 of each chromosome in the cross.

| <b>Chromosome</b> | <b>Informative<br/>Markers</b> | <b>Thinned<br/>Markers</b> | <b>Non-duplicate<br/>markers</b> | <b>Physical Length<br/>(Mb)</b> | <b>Genetic Length<br/>(cM)</b> |
|-------------------|--------------------------------|----------------------------|----------------------------------|---------------------------------|--------------------------------|
| 2                 | 120,717                        | 710                        | 440                              | 110.9                           | 206.1                          |
| 3                 | 97,706                         | 629                        | 392                              | 95.2                            | 100.7                          |
| X                 | 20,997                         | 217                        | 28                               | 24.4                            | 3.7                            |

735

736 **Table 2.** Genomic regions of QTL in physical (Mb) and map (cM) distances. Start and end positions indicate the 1.5 LOD intervals of QTL  
 737 locations (LOD peak). Bold values indicate overlapping QTL between the crosses on the 3L, a region of the *An. coluzzii* genome that  
 738 contributes to hybrid male sterility when introgressed into both *An. quadriannulatus* and *An. arabiensis* genetic backgrounds.

| Cross                                                                            | QTL  | LOD    | LOD peak (cM) | Start (cM) | End (cM) | Length (cM) | LOD peak (Mb) | Start (Mb)        | End (Mb)     | Length (Mb) | Num Genes |
|----------------------------------------------------------------------------------|------|--------|---------------|------------|----------|-------------|---------------|-------------------|--------------|-------------|-----------|
| <i>An. coluzzii</i> ×<br><i>An. quadriannulatus</i>                              | X    | 204.84 | 1.23          | 1.11       | 1.35     | 0.25        | 6.68          | 2.96              | 11.48        | 8.53        | 453       |
|                                                                                  | 2R-A | 3.78   | 1.63          | 0.63       | 2.88     | 2.26        | 1.15          | 1.03              | 1.67         | 0.63        | 49        |
|                                                                                  | 2R-B | 2.49   | 20.87         | 20.12      | 21.37    | 1.24        | 8.11          | 8.03              | 8.73         | 0.70        | 17        |
|                                                                                  | 2L   | 3.42   | 134.26        | 134.13     | 135.30   | 1.18        | 2.69          | 0.73              | 4.14         | 3.42        | 153       |
|                                                                                  | 3L-A | 2.45   | 53.95         | 53.08      | 54.57    | 1.49        | 11.18         | <b>10.18</b>      | <b>11.30</b> | 1.13        | 52        |
|                                                                                  | 3L-B | 2.26   | 67.46         | 66.21      | 68.34    | 2.12        | 22.82         | 20.86             | 23.33        | 2.47        | 78        |
| <i>An. coluzzii</i> ×<br><i>An. arabiensis</i><br>(Slotman <i>et al.</i> , 2004) | 2R   | 38.30  | 16.07         | 15.25      | 18.05    | 2.80        | 40.44         | 33.18             | 48.30        | 14.83       | -         |
|                                                                                  | 3R   | 3.69   | 12.82         | 8.41       | 19.04    | 10.63       | 14.83         | 8.79              | 44.24        | 23.58       | -         |
|                                                                                  | 3L   | 7.03   | 23.23         | 19.04      | 26.08    | 7.04        | 16.86         | <b>44.24 (3R)</b> | <b>19.77</b> | 38.37       | -         |

739

740 **Table 3.** Percentage of *An. quadriannulatus* homozygosity at hybrid male sterility autosomal QTL peaks in the full, *An. quadriannulatus* X  
741 chromosome, and *An. coluzzii* X chromosome datasets. p-values are reported for chi-square tests, which were used to test for significant  
742 deviation (p-value < 6.01e-05 after Bonferroni correction) from expected homozygosity. Expected homozygosity was calculated as the mean  
743 homozygosity percentage across all autosomal loci in the full dataset, assuming Hardy-Weinberg equilibrium (0.2409).  
744

| QTL  | cM     | Full dataset     |                | <i>An. quadriannulatus</i> X |                | <i>An. coluzzii</i> X |                |
|------|--------|------------------|----------------|------------------------------|----------------|-----------------------|----------------|
|      |        | Homozygosity (%) | $\chi^2$ p-val | Homozygosity (%)             | $\chi^2$ p-val | Homozygosity (%)      | $\chi^2$ p-val |
| 2R-A | 1.63   | 28.5             | 3.7E-03        | 32.0                         | 9.5E-06        | 20.4                  | 2.1E-01        |
| 2R-B | 20.87  | 22.2             | 2.0E-01        | 24.8                         | 6.8E-01        | 16.1                  | 6.7E-03        |
| 2L   | 134.26 | 32.1             | 1.2E-07        | 37.7                         | 3.8E-14        | 19.9                  | 1.5E-01        |
| 3L-A | 53.95  | 20.4             | 1.5E-02        | 29.0                         | 5.8E-03        | 0.0                   | 2.7E-16        |
| 3L-B | 67.46  | 20.9             | 3.5E-02        | 29.0                         | 5.8E-03        | 1.4                   | 1.3E-14        |

745

746 **Table 4.** Results of two multiple imputation QTL models (ANOVA). The top model includes only additive effects of each QTL. The bottom  
 747 model includes all additive effects and also an epistatic effect between the X chromosome and the 2L QTL.

| QTL               | cM                                     | LOD    | % Variance | F value | p-value (F) |
|-------------------|----------------------------------------|--------|------------|---------|-------------|
| X                 | 1.23                                   | 203.34 | 61.96      | 1751.36 | 2.00E-16    |
| 2R-A              | 1.63                                   | 2.47   | 0.40       | 11.36   | 7.85E-04    |
| 2R-B              | 20.87                                  | 2.89   | 0.47       | 13.30   | 2.82E-04    |
| 2L                | 134.26                                 | 1.49   | 0.24       | 6.85    | 9.04E-03    |
| 3L-A              | 53.95                                  | 1.66   | 0.27       | 7.62    | 5.90E-03    |
| 3L-B              | 67.46                                  | 2.46   | 0.40       | 11.30   | 8.12E-04    |
| <b>Model</b>      | y ~ X + 2R-A + 2R-B + 2L + 3L-A + 3L-B |        |            |         |             |
| <b>LOD</b>        | 221.25                                 |        |            |         |             |
| <b>% Variance</b> | 71.66                                  |        |            |         |             |

| QTL               | cM                                            | LOD    | % Variance | F value | p-value (F) |
|-------------------|-----------------------------------------------|--------|------------|---------|-------------|
| X                 | 1.23                                          | 207.86 | 62.68      | 907.89  | 2.00E-16    |
| 2R-A              | 1.63                                          | 2.73   | 0.43       | 12.52   | 4.25E-04    |
| 2R-B              | 20.87                                         | 3.02   | 0.48       | 13.87   | 2.10E-04    |
| 2L                | 134.26                                        | 6.02   | 0.96       | 13.96   | 1.10E-06    |
| 3L-A              | 53.95                                         | 1.62   | 0.26       | 7.40    | 6.66E-03    |
| 3L-B              | 67.46                                         | 2.15   | 0.34       | 9.87    | 1.74E-03    |
| X × 2L epistatic  |                                               | 4.53   | 0.72       | 20.90   | 5.60E-06    |
| <b>Model</b>      | y ~ X + 2R-A + 2R-B + 2L + 3L-A + 3L-B + X:2L |        |            |         |             |
| <b>LOD</b>        | 225.78                                        |        |            |         |             |
| <b>% Variance</b> | 72.39                                         |        |            |         |             |

748

749 **Table 5.** Annotated genes in the AgamP4 genome within autosomal QTL with functions related to mating, reproduction, and sperm motility  
750 and morphogenesis. Gene names in bold indicate those interacting in a regulatory network associated with sperm microtubule  
751 morphogenesis and function. STRING network analysis output can be found in Supplementary File 1:  
752 Deitz\_et\_al\_2020\_String\_protein\_interaction\_network.xlsx.  
753

| QTL  | Gene Name         | Panther Gene Ontology Family / Subfamily                         | Protein Description                                                                                                                                                                                                                                                                                                                                          | Protein Description Source                                                                                                      |
|------|-------------------|------------------------------------------------------------------|--------------------------------------------------------------------------------------------------------------------------------------------------------------------------------------------------------------------------------------------------------------------------------------------------------------------------------------------------------------|---------------------------------------------------------------------------------------------------------------------------------|
| 2R-A | <b>AGAP001229</b> | DYNEIN LIGHT CHAIN<br>TCTEX-TYPE<br>(PTHR21255:SF4)              | Tctex-1 (t-complex testis expressed-1) is a dynein light chain. Dynein translocates rhodopsin-bearing vesicles along microtubules. In mice, the chromosomal location and pattern of expression of Tctex-1 make it a candidate for involvement in male sterility.                                                                                             | <a href="https://www.ebi.ac.uk/interpro/entry/InterPro/IPR005334/">https://www.ebi.ac.uk/interpro/entry/InterPro/IPR005334/</a> |
| 2R-A | AGAP001227        | GAMMA-TUBULIN<br>COMPLEX<br>COMPONENT 5<br>(PTHR19302:SF33)      | The microtubule organizing centers (MTOCs) of eukaryotic cells are the sites of nucleation of microtubules, and are known as the centrosome in animal cells and the spindle pole body in yeast. Gamma-tubulin, which is 30% identical to alpha and beta tubulins that form microtubules, appears to be a key protein involved in nucleation of microtubules. | <a href="https://www.ebi.ac.uk/interpro/entry/InterPro/IPR007259/">https://www.ebi.ac.uk/interpro/entry/InterPro/IPR007259/</a> |
| 2R-A | AGAP001194        | MICROTUBULE-<br>ASSOCIATED PROTEIN<br>FUTSCH<br>(PTHR13843:SF12) | futsch (futsch) encodes a microtubule binding protein involved in the formation of synaptic buttons at the neuromuscular junctions. Its expression levels are regulated by the product of TBPH to prevent synaptic defects.                                                                                                                                  | <a href="https://flybase.org/reports/FBgn0259108">https://flybase.org/reports/FBgn0259108</a>                                   |

|      |                   |                                                                   |                                                                                                                                                                                                                                                                                                                                                                |                                                                                                                                 |
|------|-------------------|-------------------------------------------------------------------|----------------------------------------------------------------------------------------------------------------------------------------------------------------------------------------------------------------------------------------------------------------------------------------------------------------------------------------------------------------|---------------------------------------------------------------------------------------------------------------------------------|
| 2R-A | <b>AGAP001219</b> | TUBULIN-LIKE<br>PROTEIN ALPHA-4B-<br>RELATED<br>(PTHR11588:SF239) | Microtubules are polymers of tubulin, a dimer of two 55kDa subunits, designated alpha and beta. Within the microtubule lattice, alpha-beta heterodimers associate in a head-to-tail fashion, giving rise to microtubule polarity. Fluorescent labelling studies have suggested that tubulin is oriented in microtubules with beta-tubulin toward the plus end. | <a href="https://www.ebi.ac.uk/interpro/entry/InterPro/IPR002452/">https://www.ebi.ac.uk/interpro/entry/InterPro/IPR002452/</a> |
|------|-------------------|-------------------------------------------------------------------|----------------------------------------------------------------------------------------------------------------------------------------------------------------------------------------------------------------------------------------------------------------------------------------------------------------------------------------------------------------|---------------------------------------------------------------------------------------------------------------------------------|

|    |                   |                                                                      |                                                                                                                                                                                                                                                                                                                                                                                                                                                                                                                                                                                                                                                                            |                                                                                                                                 |
|----|-------------------|----------------------------------------------------------------------|----------------------------------------------------------------------------------------------------------------------------------------------------------------------------------------------------------------------------------------------------------------------------------------------------------------------------------------------------------------------------------------------------------------------------------------------------------------------------------------------------------------------------------------------------------------------------------------------------------------------------------------------------------------------------|---------------------------------------------------------------------------------------------------------------------------------|
| 2L | AGAP004767        | TRANSCRIPTION<br>FACTOR KEN<br>(PTHR45993:SF7)                       | Mutations in the ken and barbie locus are accompanied by the malformation of terminalia in adult <i>Drosophila</i> . Male and female genitalia often remain inside the body, and the same portions of genitalia and analia are missing in a fraction of homozygous flies. Rotated and/or duplicated terminalia are also observed. Terminalia phenotypes are enhanced by mutations in the gap gene tailless, the homeobox gene caudal, and the decapentaplegic gene that encodes a TGFbeta-like morphogen. The ken and barbie gene encodes a protein with three CCHH-type zinc finger motifs that are conserved in several transcription factors such as Krüppel and BCL-6. | <a href="https://flybase.org/reports/FBgn0011236">https://flybase.org/reports/FBgn0011236</a>                                   |
| 2L | <b>AGAP004724</b> | INTRAFLAGELLAR<br>TRANSPORT PROTEIN<br>74 HOMOLOG<br>(PTHR31432:SF0) | Intraflagellar transport of ciliary precursors such as tubulin from the cytoplasm to the ciliary tip is required for ciliogenesis. Intraflagellar transport protein 74 (IFT74) is a component of the intraflagellar transport (IFT) complex B, which contains at least 20 different protein subunits. Together with IFT81, it forms a tubulin-binding module that specifically mediates transport of tubulin within the cilium.                                                                                                                                                                                                                                            | <a href="https://www.ebi.ac.uk/interpro/entry/InterPro/IPR029602/">https://www.ebi.ac.uk/interpro/entry/InterPro/IPR029602/</a> |
| 2L | AGAP004817        | PROTEIN LINGERER<br>(PTHR16308:SF13)                                 | lingerer (lig) encodes a putative RNA binding protein that forms a complex with the products of orb and orb2. Loss of lig results in defects in copulation and short-term memory in <i>Drosophila</i> .                                                                                                                                                                                                                                                                                                                                                                                                                                                                    | <a href="https://flybase.org/reports/FBgn0020279">https://flybase.org/reports/FBgn0020279</a>                                   |



|      |                   |                                                      |                                                                                                                                                                                                                                                                                                                   |                                                                                                                                 |
|------|-------------------|------------------------------------------------------|-------------------------------------------------------------------------------------------------------------------------------------------------------------------------------------------------------------------------------------------------------------------------------------------------------------------|---------------------------------------------------------------------------------------------------------------------------------|
| 2L   | <b>AGAP004782</b> | TUBULIN-SPECIFIC CHAPERONE D (PTHR12658:SF0)         | The tubulin heterodimer consists of one alpha- and one beta-tubulin polypeptide. Tubulin-specific chaperones are essential for bring the alpha- and beta-tubulin subunits together into a tightly associated heterodimer.                                                                                         | <a href="https://www.ebi.ac.uk/interpro/entry/InterPro/IPR033162/">https://www.ebi.ac.uk/interpro/entry/InterPro/IPR033162/</a> |
| 3L-A | <b>AGAP010790</b> | CYTOPLASMIC DYNEIN 2 HEAVY CHAIN 1 (PTHR10676:SF352) | Cytoplasmic dynein 2 heavy chain 1 (DYNC2H1) is a subunit of the cytoplasmic dynein complex 2. It may function as a motor for intraflagellar retrograde transport. It also plays a role in cilia biogenesis.                                                                                                      | <a href="https://www.ebi.ac.uk/interpro/entry/InterPro/IPR026815/">https://www.ebi.ac.uk/interpro/entry/InterPro/IPR026815/</a> |
| 3L-B | AGAP011361        | CHECKPOINT PROTEIN (PTHR12900:SF0)                   | Hus1-like (Hus1-like) encodes a protein that together with proteins encoded by Rad1 and Rad9 form the 9-1-1 checkpoint protein complex. This complex plays a central role in the DNA damage-induced checkpoint response. Involved in G2/M transition of mitotic cell cycle, meiotic and mitotic nuclear division. | <a href="https://flybase.org/reports/FBgn0026417">https://flybase.org/reports/FBgn0026417</a>                                   |

755 **Table S1.** The complete list of annotated genes within autosomal QTL and their PANTHER gene ontology families / sub-families (if  
756 available).

| <b>QTL</b> | <b>Gene Name</b> | <b>Panther Gene Ontology Family / Subfamily</b>                     |
|------------|------------------|---------------------------------------------------------------------|
| 2R A       | AGAP001195       | NUCLEAR CAP-BINDING PROTEIN SUBUNIT 1 (PTHR12412:SF2)               |
| 2R A       | AGAP001226       |                                                                     |
| 2R A       | AGAP001189       | GEO07581P1-RELATED (PTHR11857:SF43)                                 |
| 2R A       | AGAP001207       | COMM DOMAIN-CONTAINING PROTEIN 4 (PTHR16231:SF4)                    |
| 2R A       | AGAP001202       | FI24011P1-RELATED (PTHR24064:SF335)                                 |
| 2R A       | AGAP001206       |                                                                     |
| 2R A       | AGAP013230       |                                                                     |
| 2R A       | AGAP013386       | DNA POLYMERASE ZETA CATALYTIC SUBUNIT (PTHR45812:SF1)               |
| 2R A       | AGAP001215       | TETRATRICOPEPTIDE REPEAT PROTEIN 39C (PTHR31859:SF1)                |
| 2R A       | AGAP001199       | AT20289P-RELATED (PTHR24276:SF78)                                   |
| 2R A       | AGAP001196       | G KINASE-ANCHORING PROTEIN 1 (PTHR14899:SF0)                        |
| 2R A       | AGAP001200       | GLYCOGEN DEBRANCHING ENZYME (PTHR10569:SF2)                         |
| 2R A       | AGAP013011       | TRICHOPLEIN KERATIN FILAMENT-BINDING PROTEIN (PTHR31183:SF2)        |
| 2R A       | AGAP013543       |                                                                     |
| 2R A       | AGAP001217       | SOLUBLE CALCIUM-ACTIVATED NUCLEOTIDASE 1 (PTHR13023:SF3)            |
| 2R A       | AGAP013056       |                                                                     |
| 2R A       | AGAP001225       |                                                                     |
| 2R A       | AGAP001223       | ATP-DEPENDENT RNA HELICASE DDX55 (PTHR24031:SF2)                    |
| 2R A       | AGAP001208       | ARGININE/SERINE-RICH COILED-COIL PROTEIN 2 (PTHR22426:SF2)          |
| 2R A       | AGAP013523       |                                                                     |
| 2R A       | AGAP001214       | SOLUTE CARRIER FAMILY 35 MEMBER G1 (PTHR22911:SF6)                  |
| 2R A       | AGAP001187       | HOMEBOX PROTEIN CUT (PTHR14043:SF2)                                 |
| 2R A       | AGAP001205       | CHITIN SYNTHASE 2, ISOFORM D (PTHR22914:SF14)                       |
| 2R A       | AGAP013012       |                                                                     |
| 2R A       | AGAP001201       | DEFECTIVE PROBOSCIS EXTENSION RESPONSE 7, ISOFORM F (PTHR23279:SF6) |
| 2R A       | AGAP001211       | LD44762P (PTHR47980:SF24)                                           |
| 2R A       | AGAP001213       |                                                                     |

|      |            |                                                                               |
|------|------------|-------------------------------------------------------------------------------|
| 2R A | AGAP001190 | AT20289P-RELATED (PTHR24276:SF78)                                             |
| 2R A | AGAP001229 | DYNEIN LIGHT CHAIN TCTEX-TYPE (PTHR21255:SF4)                                 |
| 2R A | AGAP001193 |                                                                               |
| 2R A | AGAP001228 | DNA-DIRECTED RNA POLYMERASE II SUBUNIT RPB4 (PTHR21297:SF0)                   |
| 2R A | AGAP013518 |                                                                               |
| 2R A | AGAP001198 |                                                                               |
| 2R A | AGAP001227 | GAMMA-TUBULIN COMPLEX COMPONENT 5 (PTHR19302:SF33)                            |
| 2R A | AGAP001194 | MICROTUBULE-ASSOCIATED PROTEIN FUTSCH (PTHR13843:SF12)                        |
| 2R A | AGAP013177 |                                                                               |
|      |            | CLEAVAGE AND POLYADENYLATION SPECIFICITY FACTOR SUBUNIT 3<br>(PTHR11203:SF11) |
| 2R A | AGAP001224 |                                                                               |
| 2R A | AGAP001192 |                                                                               |
| 2R A | AGAP001209 | UBIQUITIN CARBOXYL-TERMINAL HYDROLASE 32 (PTHR21646:SF46)                     |
| 2R A | AGAP001212 | PEPTIDOGLYCAN-RECOGNITION PROTEIN LB-RELATED (PTHR11022:SF67)                 |
| 2R A | AGAP013048 | GEO11133P1 (PTHR48024:SF12)                                                   |
| 2R A | AGAP001219 | TUBULIN-LIKE PROTEIN ALPHA-4B-RELATED (PTHR11588:SF239)                       |
| 2R A | AGAP001220 | NAD-DEPENDENT PROTEIN DEACETYLASE SIRTUIN-7 (PTHR45853:SF4)                   |
| 2R A | AGAP001222 | METHYLTRANSFERASE-LIKE PROTEIN 23 (PTHR14614:SF2)                             |
| 2R A | AGAP001203 | AGAP001203-PA (PTHR22933:SF19)                                                |
| 2R B | AGAP001694 | EXOCYST COMPLEX COMPONENT 4 (PTHR14146:SF0)                                   |
| 2R B | AGAP001680 | LD08718P (PTHR12876:SF35)                                                     |
| 2R B | AGAP001687 | RHO GTPASE-ACTIVATING PROTEIN 19 (PTHR14963:SF7)                              |
| 2R B | AGAP001695 | ZGC:112496 (PTHR21521:SF0)                                                    |
| 2R B | AGAP001688 | EXOSTOSIN-LIKE 3 (PTHR11062:SF73)                                             |
| 2R B | AGAP001690 | RAB3 INTERACTING MOLECULE, ISOFORM F (PTHR12157:SF21)                         |
| 2R B | AGAP001681 | UBIQUITIN CONJUGATION FACTOR E4 A (PTHR13931:SF2)                             |
| 2R B | AGAP001684 | ALKALINE PHOSPHATASE-RELATED (PTHR11596:SF75)                                 |
| 2R B | AGAP001686 | U6 SNRNA-ASSOCIATED SM-LIKE PROTEIN LSM1 (PTHR15588:SF8)                      |
| 2R B | AGAP001677 | LD24704P (PTHR10026:SF13)                                                     |
| 2R B | AGAP001682 | MITOCHONDRIAL INNER MEMBRANE PROTEASE SUBUNIT 1 (PTHR12383:SF16)              |

|      |            |                                                                                                                                                    |
|------|------------|----------------------------------------------------------------------------------------------------------------------------------------------------|
| 2R B | AGAP001683 | PERIPHERAL PLASMA MEMBRANE PROTEIN CASK (PTHR23122:SF7)                                                                                            |
| 2R B | AGAP013145 | PROTEIN COUCH POTATO (PTHR10501:SF41)                                                                                                              |
| 2R B | AGAP001685 | NUCLEAR PORE COMPLEX PROTEIN NUP107 (PTHR13003:SF2)                                                                                                |
| 2L   | AGAP004812 | 85/88 KDA CALCIUM-INDEPENDENT PHOSPHOLIPASE A2 (PTHR24139:SF34)<br>EUKARYOTIC TRANSLATION INITIATION FACTOR 3 SUBUNIT C-RELATED<br>(PTHR13937:SF0) |
| 2L   | AGAP004725 | WW DOMAIN-CONTAINING ADAPTER PROTEIN WITH COILED-COIL (PTHR15911:SF6)                                                                              |
| 2L   | AGAP004686 | COATOMER SUBUNIT BETA' (PTHR19876:SF2)                                                                                                             |
| 2L   | AGAP004798 | PIRNAS BIOMIMETIC PROTEIN EXD1 (PTHR46628:SF1)                                                                                                     |
| 2L   | AGAP004757 | PROTEIN SPROUTY (PTHR12365:SF7)                                                                                                                    |
| 2L   | AGAP004823 | TRANSCRIPTION FACTOR KEN (PTHR45993:SF7)                                                                                                           |
| 2L   | AGAP004767 | CHORION TRANSCRIPTION FACTOR CF2-RELATED (PTHR24388:SF77)                                                                                          |
| 2L   | AGAP004729 | GALECTIN (PTHR11346:SF164)                                                                                                                         |
| 2L   | AGAP004806 | TRANSCRIPTION ELONGATION REGULATOR HOMOLOG (PTHR15377:SF3)                                                                                         |
| 2L   | AGAP004745 |                                                                                                                                                    |
| 2L   | AGAP004799 |                                                                                                                                                    |
| 2L   | AGAP004771 |                                                                                                                                                    |
| 2L   | AGAP004718 | RE21922P (PTHR11003:SF276)                                                                                                                         |
| 2L   | AGAP004723 | FI06908P-RELATED (PTHR22812:SF151)                                                                                                                 |
| 2L   | AGAP004827 | AGAP004827-PA (PTHR19871:SF28)                                                                                                                     |
| 2L   | AGAP004699 | RAF HOMOLOG SERINE/THREONINE-PROTEIN KINASE RAF (PTHR44329:SF193)                                                                                  |
| 2L   | AGAP004719 | EG:BACR7A4.3 PROTEIN-RELATED (PTHR24260:SF107)                                                                                                     |
| 2L   | AGAP004763 | FI02944P-RELATED (PTHR10174:SF216)                                                                                                                 |
| 2L   | AGAP004687 | 6-PHOSPHOGLUCONATE DEHYDROGENASE, DECARBOXYLATING (PTHR11811:SF25)                                                                                 |
| 2L   | AGAP004811 |                                                                                                                                                    |
| 2L   | AGAP004739 | H/ACA RIBONUCLEOPROTEIN COMPLEX SUBUNIT DKC1 (PTHR23127:SF0)                                                                                       |
| 2L   | AGAP004807 | GALECTIN (PTHR11346:SF164)                                                                                                                         |
| 2L   | AGAP004797 | AGAP004797-PA (PTHR22904:SF525)                                                                                                                    |
| 2L   | AGAP004781 | BETA4GALNACTA (PTHR19300:SF52)                                                                                                                     |
| 2L   | AGAP004810 |                                                                                                                                                    |
| 2L   | AGAP004819 | LP05237P-RELATED (PTHR12300:SF22)                                                                                                                  |

|    |                       |                                                                                                                                                |
|----|-----------------------|------------------------------------------------------------------------------------------------------------------------------------------------|
| 2L | AGAP004786            | PYRUVATE DEHYDROGENASE E1 COMPONENT SUBUNIT ALPHA (PTHR11516:SF55)                                                                             |
| 2L | AGAP004747            | PRESEQUENCE PROTEASE, MITOCHONDRIAL (PTHR43016:SF13)                                                                                           |
| 2L | AGAP004724            | INTRAFLAGELLAR TRANSPORT PROTEIN 74 HOMOLOG (PTHR31432:SF0)                                                                                    |
| 2L | AGAP004780            | CYCLIN-DEPENDENT KINASE 12 (PTHR24056:SF233)                                                                                                   |
| 2L | AGAP004791,AGAP004789 | HIGH MOBILITY GROUP PROTEIN 2 (PTHR46040:SF3)                                                                                                  |
| 2L | AGAP004693            | NUCLEAR RECEPTOR SUBFAMILY 6 GROUP A MEMBER 1 (PTHR48092:SF18)                                                                                 |
| 2L | AGAP004762            | FI02944P-RELATED (PTHR10174:SF216)                                                                                                             |
| 2L | AGAP004711            | ATP-DEPENDENT RNA HELICASE DDX41-RELATED (PTHR47958:SF103)                                                                                     |
| 2L | AGAP004733            | AGAP004733-PA (PTHR46105:SF5)                                                                                                                  |
| 2L | AGAP004758            | PROTEASOMAL UBIQUITIN RECEPTOR ADRM1 (PTHR12225:SF0)                                                                                           |
| 2L | AGAP004769            | RE63021P (PTHR24070:SF406)                                                                                                                     |
| 2L | AGAP004748            |                                                                                                                                                |
| 2L | AGAP004717            | FI03418P (PTHR11003:SF279)                                                                                                                     |
| 2L | AGAP004800            |                                                                                                                                                |
| 2L | AGAP004696            | HOMEBOX PROTEIN EXTRADENTICLE (PTHR11850:SF108)<br>OXYGEN-DEPENDENT COPROPORPHYRINOGEN-III OXIDASE, MITOCHONDRIAL<br>(PTHR10755:SF0)           |
| 2L | AGAP004749            |                                                                                                                                                |
| 2L | AGAP004768            | PERIODIC TRYPTOPHAN PROTEIN 1 HOMOLOG (PTHR14091:SF0)                                                                                          |
| 2L | AGAP004813            |                                                                                                                                                |
| 2L | AGAP004737            | RHOMBOID-4 (PTHR45840:SF8)                                                                                                                     |
| 2L | AGAP004772            | SLIT-ROBO GAP HOMOLOG (PTHR14166:SF17)                                                                                                         |
| 2L | AGAP004742            | PYRUVATE CARBOXYLASE, MITOCHONDRIAL (PTHR43778:SF2)                                                                                            |
| 2L | AGAP004752            | TRNA (GUANINE-N(7)-)-METHYLTRANSFERASE (PTHR23417:SF16)<br>SUCCINATE--COA LIGASE [ADP-FORMING] SUBUNIT BETA, MITOCHONDRIAL<br>(PTHR11815:SF10) |
| 2L | AGAP004744            |                                                                                                                                                |
| 2L | AGAP004776            | PRE-MRNA-SPLICING FACTOR SLU7 (PTHR12942:SF2)                                                                                                  |
| 2L | AGAP004770            | GH13245P2-RELATED (PTHR24276:SF83)                                                                                                             |
| 2L | AGAP004759            | OLIGORIBONUCLEASE, MITOCHONDRIAL (PTHR11046:SF0)                                                                                               |
| 2L | AGAP004820            | RNA 3'-TERMINAL PHOSPHATE CYCLASE (PTHR11096:SF0)                                                                                              |
| 2L | AGAP004753            |                                                                                                                                                |
| 2L | AGAP004741            | AT07769P-RELATED (PTHR24260:SF90)                                                                                                              |

|    |                       |                                                                                                                                         |
|----|-----------------------|-----------------------------------------------------------------------------------------------------------------------------------------|
| 2L | AGAP004814            |                                                                                                                                         |
| 2L | AGAP004703            | DNA-DIRECTED RNA POLYMERASE III SUBUNIT RPC1 (PTHR19376:SF32)                                                                           |
| 2L | AGAP004704            | CXXC-TYPE ZINC FINGER PROTEIN 1 (PTHR46174:SF1)                                                                                         |
| 2L | AGAP004755            | VACUOLAR PROTEIN-SORTING-ASSOCIATED PROTEIN 36 (PTHR13128:SF12)                                                                         |
| 2L | AGAP004715            | FI22513P1 (PTHR13847:SF257)                                                                                                             |
| 2L | AGAP004712            |                                                                                                                                         |
| 2L | AGAP004691            | CHIP, ISOFORM B (PTHR10378:SF19)                                                                                                        |
| 2L | AGAP004765            | ATP-DEPENDENT RNA HELICASE DDX1 (PTHR24031:SF307)                                                                                       |
| 2L | AGAP004722            | IRON-SULFUR CLUSTER CO-CHAPERONE PROTEIN HSCB (PTHR14021:SF15)                                                                          |
| 2L | AGAP004692            | RAS GTPASE-ACTIVATING PROTEIN-RELATED (PTHR10194:SF125)<br>SNAIL FAMILY ZINC FINGER 2 TRANSCRIPTION FACTOR HOMOLOG<br>(PTHR24409:SF375) |
| 2L | AGAP004764            |                                                                                                                                         |
| 2L | AGAP004802            | 4-HYDROXYPHENYLPYRUVATE DIOXYGENASE (PTHR11959:SF1)                                                                                     |
| 2L | AGAP004804            |                                                                                                                                         |
| 2L | AGAP004778            | BOLA-LIKE PROTEIN 3 (PTHR46188:SF1)                                                                                                     |
| 2L | AGAP004790,AGAP004788 | ATP SYNTHASE MEMBRANE SUBUNIT DAPIT, MITOCHONDRIAL (PTHR34038:SF1)                                                                      |
| 2L | AGAP004777            | AGAP004777-PA (PTHR21228:SF62)                                                                                                          |
| 2L | AGAP004773            | PYRUVATE DEHYDROGENASE E1 COMPONENT SUBUNIT ALPHA (PTHR11516:SF55)                                                                      |
| 2L | AGAP004720            | AGAP004720-PA (PTHR11003:SF263)                                                                                                         |
| 2L | AGAP004815            |                                                                                                                                         |
| 2L | AGAP004794            | MIP10846P1-RELATED (PTHR11610:SF161)                                                                                                    |
| 2L | AGAP004793            | ORNITHINE AMINOTRANSFERASE, MITOCHONDRIAL (PTHR11986:SF18)                                                                              |
| 2L | AGAP004710            | CYTOCHROME B-C1 COMPLEX SUBUNIT 9 (PTHR12980:SF0)                                                                                       |
| 2L | AGAP004808            | AMINOPEPTIDASE (PTHR11533:SF283)                                                                                                        |
| 2L | AGAP004805            | FORMIN-LIKE PROTEIN (PTHR45857:SF6)                                                                                                     |
| 2L | AGAP004738            | PROTEIN RED (PTHR12765:SF5)                                                                                                             |
| 2L | AGAP004761            | MULTIPLE WING HAIRS, ISOFORM C (PTHR45857:SF4)                                                                                          |
| 2L | AGAP004824            | EUKARYOTIC TRANSLATION INITIATION FACTOR 5B (PTHR43381:SF4)                                                                             |
| 2L | AGAP004740            | AT07769P-RELATED (PTHR24260:SF90)                                                                                                       |
| 2L | AGAP004795            | RNA POLYMERASE II ELONGATION FACTOR ELL (PTHR23288:SF17)                                                                                |

|    |            |                                                                      |
|----|------------|----------------------------------------------------------------------|
| 2L | AGAP004731 | RH14732P (PTHR12253:SF34)                                            |
| 2L | AGAP004736 | MITOCHONDRIAL RIBOSOME-ASSOCIATED GTPASE 1 (PTHR45782:SF4)           |
| 2L | AGAP004766 | ENDOPHILIN-A (PTHR14167:SF89)                                        |
| 2L | AGAP004709 | 39S RIBOSOMAL PROTEIN L18, MITOCHONDRIAL (PTHR12899:SF3)             |
| 2L | AGAP004787 | FATTY ACYL-COA REDUCTASE (PTHR11011:SF24)                            |
| 2L | AGAP004784 | FATTY ACYL-COA REDUCTASE (PTHR11011:SF24)                            |
|    |            | PHOSPHATIDYLINOSITOL-GLYCAN BIOSYNTHESIS CLASS F PROTEIN-RELATED     |
| 2L | AGAP004816 | (PTHR43157:SF31)                                                     |
| 2L | AGAP004708 | ARGININE--TRNA LIGASE, CYTOPLASMIC-RELATED (PTHR11956:SF5)           |
| 2L | AGAP004707 | SODIUM CHANNEL PROTEIN PARA (PTHR10037:SF288)                        |
| 2L | AGAP004756 | F-BOX/WD REPEAT-CONTAINING PROTEIN 4 (PTHR14381:SF1)                 |
| 2L | AGAP004706 |                                                                      |
| 2L | AGAP004690 | PUPAL CUTICLE PROTEIN C1B-LIKE PROTEIN (PTHR39068:SF5)               |
| 2L | AGAP004785 | GH10083P-RELATED (PTHR10174:SF222)                                   |
| 2L | AGAP004801 | HUNTINGTIN INTERACTING PROTEIN 1 (PTHR10407:SF15)                    |
| 2L | AGAP004694 | RE24423P (PTHR11161:SF22)                                            |
| 2L | AGAP004818 | 28S RIBOSOMAL PROTEIN S16, MITOCHONDRIAL (PTHR12919:SF27)            |
| 2L | AGAP004689 | LD40707P (PTHR13055:SF12)                                            |
| 2L | AGAP004817 | PROTEIN LINGERER (PTHR16308:SF13)                                    |
| 2L | AGAP004700 | FI18411P1-RELATED (PTHR24260:SF91)                                   |
| 2L | AGAP004726 | AGAP004726-PA (PTHR10559:SF18)                                       |
| 2L | AGAP004716 |                                                                      |
| 2L | AGAP004774 | HOST CELL FACTOR (PTHR46003:SF1)                                     |
| 2L | AGAP004713 |                                                                      |
| 2L | AGAP004825 | BCDNA.LD24702 (PTHR13030:SF14)                                       |
| 2L | AGAP004792 | STAR-RELATED LIPID TRANSFER PROTEIN 7, MITOCHONDRIAL (PTHR19308:SF8) |
| 2L | AGAP004775 | XAA-PRO DIPEPTIDASE (PTHR43226:SF1)                                  |
| 2L | AGAP004754 | CASPASE DRONC (PTHR10454:SF196)                                      |
| 2L | AGAP004714 | CROL ALPHA (PTHR23226:SF176)                                         |
|    |            | VACUOLAR ATPASE ASSEMBLY INTEGRAL MEMBRANE PROTEIN VMA21             |
| 2L | AGAP013546 | HOMOLOG (PTHR31792:SF6)                                              |

|       |            |                                                                                              |
|-------|------------|----------------------------------------------------------------------------------------------|
| 2L    | AGAP004782 | TUBULIN-SPECIFIC CHAPERONE D (PTHR12658:SF0)                                                 |
| 2L    | AGAP004743 | TRANSMEMBRANE EMP24 DOMAIN-CONTAINING PROTEIN 2 (PTHR22811:SF177)                            |
| 2L    | AGAP004728 | ARMADILLO REPEAT-CONTAINING PROTEIN 2 (PTHR21356:SF1)                                        |
| 2L    | AGAP004809 | AMINOPEPTIDASE (PTHR11533:SF283)                                                             |
| 2L    | AGAP004695 | MULTIVESICULAR BODY SUBUNIT 12A (PTHR31612:SF2)                                              |
| <hr/> |            |                                                                                              |
| 3L A  | AGAP010820 |                                                                                              |
| 3L A  | AGAP010803 |                                                                                              |
| 3L A  | AGAP010787 | PROTEIN TIMELESS HOMOLOG (PTHR22940:SF4)                                                     |
| 3L A  | AGAP010790 | CYTOPLASMIC DYNEIN 2 HEAVY CHAIN 1 (PTHR10676:SF352)                                         |
| 3L A  | AGAP010793 | SYNEMBRYN (PTHR12425:SF5)                                                                    |
| 3L A  | AGAP010809 | CHAOPTIN-LIKE PROTEIN (PTHR45617:SF82)                                                       |
| 3L A  | AGAP010814 | GH01829P-RELATED (PTHR11412:SF136)                                                           |
| 3L A  | AGAP010789 | LD24340P (PTHR39069:SF4)                                                                     |
| 3L A  | AGAP010784 | PROTEIN O-MANNOSYL-TRANSFERASE 1-RELATED (PTHR10050:SF51)                                    |
| 3L A  | AGAP010812 | GH01829P-RELATED (PTHR11412:SF136)                                                           |
| 3L A  | AGAP010798 | GH13245P2-RELATED (PTHR24276:SF83)                                                           |
| 3L A  | AGAP010792 | NADH DEHYDROGENASE [UBIQUINONE] 1 ALPHA SUBCOMPLEX SUBUNIT 9, MITOCHONDRIAL (PTHR12126:SF11) |
| 3L A  | AGAP010777 | HUNCHBACK-LIKE (PTHR24392:SF33)                                                              |
| 3L A  | AGAP010811 | GH05177P-RELATED (PTHR19143:SF383)                                                           |
| 3L A  | AGAP013327 | PEROXIDASE (PTHR11475:SF86)                                                                  |
| 3L A  | AGAP010817 | AGAP006059-PA (PTHR47537:SF3)                                                                |
| 3L A  | AGAP010818 | GH01829P-RELATED (PTHR11412:SF136)                                                           |
| 3L A  | AGAP010783 | GEO02292P1-RELATED (PTHR23301:SF79)                                                          |
| 3L A  | AGAP010799 |                                                                                              |
| 3L A  | AGAP010813 |                                                                                              |
| 3L A  | AGAP010786 | RNA (RNA) POLYMERASE II ASSOCIATED PROTEIN HOMOLOG (PTHR45984:SF1)                           |
| 3L A  | AGAP010816 | GH01829P-RELATED (PTHR11412:SF136)                                                           |
| 3L A  | AGAP010802 | COREPRESSOR OF PANGOLIN, ISOFORM A-RELATED (PTHR12243:SF47)                                  |
| 3L A  | AGAP010780 |                                                                                              |



|      |            |                                                                                       |
|------|------------|---------------------------------------------------------------------------------------|
| 3L A | AGAP010782 | RAL GUANINE NUCLEOTIDE DISSOCIATION STIMULATOR-LIKE, ISOFORM E (PTHR23113:SF312)      |
| 3L A | AGAP010800 | ZINC FINGER CCCH DOMAIN-CONTAINING PROTEIN 18 (PTHR46582:SF1)                         |
| 3L A | AGAP010807 | TRNA PSEUDOURIDINE(38/39) SYNTHASE (PTHR11142:SF5)                                    |
| 3L A | AGAP010819 | GH01829P-RELATED (PTHR11412:SF136)                                                    |
| 3L A | AGAP010785 | FATTY ACYL-COA REDUCTASE (PTHR11011:SF81)                                             |
| 3L A | AGAP010805 |                                                                                       |
| 3L A | AGAP010806 | BCDNA.GH04802 (PTHR11003:SF158)                                                       |
| 3L A | AGAP010808 | ARC, ISOFORM A (PTHR19964:SF69)                                                       |
| 3L A | AGAP010776 | WHIRLIN (PTHR23116:SF37)                                                              |
| 3L A | AGAP010791 | POLYRIBONUCLEOTIDE NUCLEOTIDYLTRANSFERASE 1, MITOCHONDRIAL (PTHR11252:SF0)            |
| 3L A | AGAP010794 | FI23527P1 (PTHR45820:SF4)                                                             |
| 3L A | AGAP010801 | PHOSPHATIDYLINOSITOL 4-KINASE ALPHA-RELATED (PTHR10048:SF15)                          |
| 3L A | AGAP010804 | SI:CH73-302O18.2 (PTHR45752:SF27)                                                     |
| 3L B | AGAP011332 | FINGER PUTATIVE TRANSCRIPTION FACTOR FAMILY-RELATED (PTHR24399:SF23)                  |
| 3L B | AGAP011316 | SENTRIN-SPECIFIC PROTEASE 8 (PTHR46468:SF1)                                           |
| 3L B | AGAP011345 | GROWTH ARREST AND DNA DAMAGE-INDUCIBLE PROTEINS-INTERACTING PROTEIN 1 (PTHR31761:SF1) |
| 3L B | AGAP011320 | SUBFAMILY NOT NAMED (PTHR24230:SF141)                                                 |
| 3L B | AGAP011387 | MITOCHONDRIAL DIVISION PROTEIN 1-RELATED (PTHR19857:SF8)                              |
| 3L B | AGAP011323 | TCF3 FUSION PARTNER (PTHR35084:SF1)                                                   |
| 3L B | AGAP011361 | CHECKPOINT PROTEIN (PTHR12900:SF0)                                                    |
| 3L B | AGAP011330 | GLUTAREDOXIN-LIKE PROTEIN C5ORF63 HOMOLOG (PTHR33558:SF1)                             |
| 3L B | AGAP011317 |                                                                                       |
| 3L B | AGAP011374 | ADAPTOR PROTEIN COMPLEX 1, MU SUBUNIT (PTHR10529:SF262)                               |
| 3L B | AGAP011365 | CARBOXYLIC ESTER HYDROLASE (PTHR43142:SF1)                                            |
| 3L B | AGAP011377 |                                                                                       |
| 3L B | AGAP011389 | PROTEIN CBG05349 (PTHR15192:SF8)                                                      |
| 3L B | AGAP011376 |                                                                                       |
| 3L B | AGAP011362 | GATA ZINC FINGER DOMAIN-CONTAINING PROTEIN 1 (PTHR13340:SF2)                          |

|      |            |                                                               |
|------|------------|---------------------------------------------------------------|
| 3L B | AGAP011329 | ACETYL-COA ACETYLTRANSFERASE, MITOCHONDRIAL (PTHR18919:SF156) |
| 3L B | AGAP011356 | AMYLOID PROTEIN-BINDING PROTEIN 2 (PTHR46575:SF1)             |
| 3L B | AGAP011368 | AGAP011368-PA (PTHR21066:SF17)                                |
| 3L B | AGAP011352 | GH12731P-RELATED (PTHR10937:SF0)                              |
| 3L B | AGAP011338 | GDP-FUCOSE PROTEIN O-FUCOSYLTRANSFERASE 1 (PTHR21420:SF3)     |
| 3L B | AGAP011349 | GAMMA-AMINOBUTYRIC ACID RECEPTOR ALPHA-LIKE (PTHR18945:SF835) |
| 3L B | AGAP011363 | RAS-RELATED PROTEIN RAB6 (PTHR24073:SF352)                    |
| 3L B | AGAP011326 | DEATH-ASSOCIATED INHIBITOR OF APOPTOSIS 2 (PTHR10044:SF139)   |
| 3L B | AGAP011372 |                                                               |
| 3L B | AGAP011367 |                                                               |
| 3L B | AGAP011321 | PROTOPORPHYRINOGEN OXIDASE (PTHR42923:SF3)                    |

---

757
